# Supplementary material for: Pd-catalyzed decarboxylative ortho-acylation of O-methyl oximes with phenylglyoxylic acids
Source: Royal Society of Chemistry journal article supplement (doi:10.1039/c2cc38861h), 2013-01-01

## Supporting Information

### For

**“Pd-catalyzed decarboxylative ortho-acylation of *O*-methyl oximes with phenylglyoxylic acids”**

Zhiyong Yang,<sup>a</sup> Xiang chen,<sup>a</sup> Jidan Liu,<sup>a</sup> Qingwen Gui,<sup>a</sup> Kai Xie,<sup>a</sup> Miaomiao Li,<sup>a</sup> Ze Tan,<sup>\*a</sup>

<sup>a</sup> State Key Laboratory of Chemo/Biosensing and Chemometrics, College of Chemistry and Chemical Engineering, Hunan University, Changsha 410082, P. R. China. Tel: +86-731 88822400; E-mail: [ztanze@gmail.com](mailto:ztanze@gmail.com)<sup>b</sup>

## Supporting information

### *Table of contents*

|                                                         |   |
|---------------------------------------------------------|---|
| I. General Information .....                            | 2 |
| II. Experimental Section.....                           | 2 |
| III. References and notes:.....                         | 6 |
| IV. <sup>1</sup> H and <sup>13</sup> C NMR Spectra..... | 7 |

## I. General Information

$^1\text{H}$  NMR and  $^{13}\text{C}$  NMR were recorded in  $\text{CDCl}_3$  at room temperature on the spectrometer (400 MHz  $^1\text{H}$ , 100 MHz  $^{13}\text{C}$ ). The chemical-shifts scale is based on internal TMS. Data for  $^1\text{H}$  NMR and  $^{13}\text{C}$  NMR are reported as follows: chemical shift ( $\delta$  ppm), multiplicity, integration, and coupling constant (Hz).

## II. Experimental Section

### Preparation of starting materials:

**Preparation for oximes and  $\alpha$ -oxocarboxylic acids.** *O*-methyl (*O*-phenyl) oximes were prepared by reacting the corresponding aldehydes or ketones with  $\text{MeONH}_2\cdot\text{HCl}$  ( $\text{BnONH}_2\cdot\text{HCl}$ ) in EtOH in for about 5 h.<sup>1</sup> All the desired oximes were purified by flash column chromatography.  $\alpha$ -oxocarboxylic acids (**2a**, **2g**) were purchased from Alfa Aesar. Other  $\alpha$ -oxocarboxylic acids were prepared from oxidation of corresponding methyl ketones with  $\text{SeO}_2$  according to the reported procedure.<sup>2</sup>

### General procedure for the decarboxylative acylation reactions

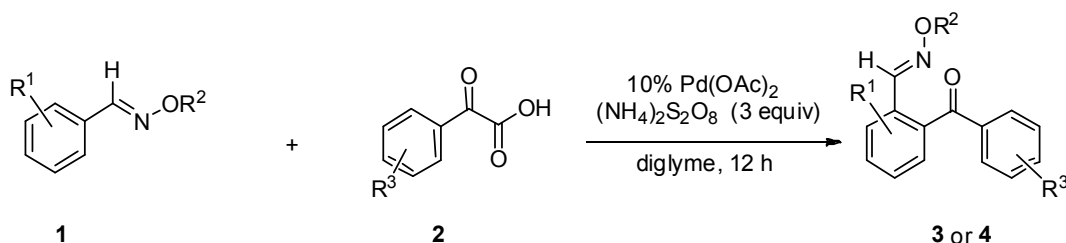

A 25-mL round bottom flask was charged with *O*-methyl (*O*-phenyl) oximes (**1**, 0.5 mmol), phenylglyoxylic acids (**2**, 1.0 mmol),  $\text{Pd(OAc)}_2$  (0.05 mmol),  $(\text{NH}_4)_2\text{S}_2\text{O}_8$  (1.5 mmol) and diglyme (5 mL). The reaction flask was then stirred at 35 °C under  $\text{N}_2$  for 12 h (monitored by TLC). Upon completion of the reaction, the mixture was diluted with ethyl acetate and filtered through a short silica gel column to remove the deposition with ethyl acetate (100 ml). Then the ethyl acetate was washed with water (30 ml  $\times$  3), and then with brine, dried over  $\text{MgSO}_4$ , and filtered. The solvents were removed via vacuum evaporation. The crude products were purified with flash chromatography (silica gel, gradient eluent of EtOAc in *n*-pentane: 1%, v/v) to yield the product **3** or **4** as a yellow or colorless solid (oil). The appropriate eluent for each product is referred to the detail information as below.

### Data of new compounds

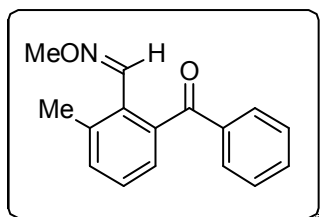

**(3a) 2-benzoyl-6-methylbenzaldehyde *O*-methyl oxime.** TLC  $R_f$  = 0.40 (petroleum ether/ ethyl acetate, 12/1); Yield: 71%; yellow oil;  $^1\text{H}$  NMR (400 MHz,  $\text{CDCl}_3$ ):  $\delta$  2.46 (s, 3H), 3.66 (s, 3H), 7.25 (d,  $J$  = 6.4 Hz, 1H), 7.34 (t,  $J$  = 6.4 Hz, 1H), 7.35 (d,  $J$  = 6.4 Hz, 1H), 7.40 (t,  $J$  = 7.6 Hz, 2H), 7.53 (t,  $J$  = 7.6 Hz, 1H), 7.70 (d,  $J$  = 8.0 Hz, 2H), 8.18 (s, 1H);  $^{13}\text{C}$  NMR (100 MHz,  $\text{CDCl}_3$ ):  $\delta$  20.25, 61.85, 126.33, 128.26 (2C), 128.59, 128.83, 129.45 (2C), 132.16, 132.68, 137.55, 137.84, 139.68, 145.33, 197.94; IR (neat) 2945, 2906, 1725, 1641, 1518, 1483, 1272, 1052, 798, 696  $\text{cm}^{-1}$ ; HRMS (EI)  $m/z$  calcd. for  $\text{C}_{16}\text{H}_{15}\text{NO}_2$ : 253.1103, found 253.1105; Anal. Calcd. for  $\text{C}_{16}\text{H}_{15}\text{NO}_2$ : Elemental Analysis: C, 75.87; H, 5.97; N, 5.53; Found: C, 75.97; H, 6.05; N, 5.39.

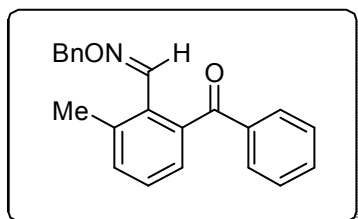

**(3b) 2-benzoyl-6-methylbenzaldehyde *O*-benzyl oxime.** TLC  $R_f$  = 0.44 (petroleum ether/ ethyl acetate, 12/1); Yield: 65%; colorless solid; m.p.: 78.5-79.3 °C;  $^1\text{H}$  NMR (400 MHz,  $\text{CDCl}_3$ ):  $\delta$  2.42 (s, 3H), 4.85 (s, 2H), 7.13 (d,  $J$  = 7.2 Hz, 2H), 7.21 (d,  $J$  = 7.6 Hz, 1H), 7.24-7.25 (m, 3H), 7.30 (d,  $J$  = 4.0 Hz, 1H), 7.31 (t,  $J$  = 7.6 Hz, 1H), 7.38 (t,  $J$  = 7.6 Hz, 2H), 7.52 (t,  $J$  = 7.6 Hz, 1H), 7.72 (d,  $J$  = 7.2 Hz, 2H), 8.26 (s, 1H);  $^{13}\text{C}$  NMR (100 MHz,  $\text{CDCl}_3$ ):  $\delta$  20.52, 76.57, 126.34, 128.08, 128.47 (2C), 128.51 (2C), 128.67 (2C), 128.78, 129.01, 129.79 (2C), 132.30, 132.91, 137.26, 137.90, 137.94, 139.99, 146.07, 197.97; IR (neat) 2920, 1725, 1602, 1536, 1483, 1370, 1317, 833, 759, 696  $\text{cm}^{-1}$ ; HRMS (EI)  $m/z$  calcd. for  $\text{C}_{22}\text{H}_{19}\text{NO}_2$ : 329.1416, found

329.1418; Anal. Calcd. for  $C_{22}H_{19}NO_2$ : Elemental Analysis: C, 80.22; H, 5.81; N, 4.25; Found: C, 80.31; H, 5.91; N, 4.07.

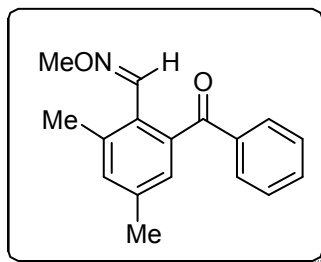

**(3c) 2-benzoyl-4,6-dimethylbenzaldehyde O-methyl oxime.** TLC  $R_f$  = 0.45 (petroleum ether/ ethyl acetate, 12/1); Yield: 75%; colorless solid; m.p.: 79.4-81.8 °C;  $^1H$  NMR (400 MHz,  $CDCl_3$ ):  $\delta$  2.35 (s, 3H), 2.41 (s, 3H), 3.63 (s, 3H), 7.05 (s, 1H), 7.15 (s, 1H), 7.39 (t,  $J$  = 7.6 Hz, 2H), 7.52 (t,  $J$  = 7.6 Hz, 1H), 7.73 (d,  $J$  = 8.0 Hz, 2H), 8.13 (s, 1H);  $^{13}C$  NMR(100 MHz,  $CDCl_3$ ):  $\delta$  20.83, 21.24, 61.93, 126.34, 128.42, 129.49 (2C), 129.70 (2C), 130.52, 132.70, 136.29, 137.95, 138.17, 140.00, 146.08, 197.96; MS (m/z) 267 ( $M^+$ ). Anal. Calcd. for  $C_{17}H_{17}NO_2$ : Elemental Analysis: C, 76.38; H, 6.41; N, 5.24; Found: C, 76.47; H, 6.48; N, 5.09.

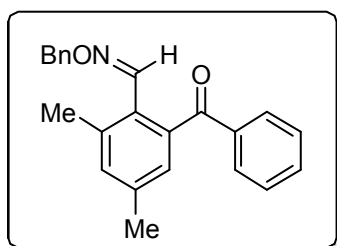

**(3d) 2-benzoyl-4,6-dimethylbenzaldehyde O-benzyl oxime.** TLC  $R_f$  = 0.45 (petroleum ether/ ethyl acetate, 12/1); Yield: 73%; colorless solid; m.p.: 97.3-98.4 °C;  $^1H$  NMR (400 MHz,  $CDCl_3$ ):  $\delta$  2.34 (s, 3H), 2.38 (s, 3H), 4.83 (s, 2H), 7.02 (s, 1H), 7.11-7.14 (m, 3H), 7.25-7.26 (m, 3H), 7.38 (t,  $J$  = 7.6 Hz, 2H), 7.52 (t,  $J$  = 7.6 Hz, 1H), 7.72 (d,  $J$  = 8.0 Hz, 2H), 8.22 (s, 1H);  $^{13}C$  NMR(100 MHz,  $CDCl_3$ ):  $\delta$  20.45, 21.35, 76.48, 125.89, 126.90, 128.05, 128.47 (2C), 128.49 (2C), 128.69 (2C), 129.76 (2C), 132.85, 133.05, 137.33, 137.76, 138.00, 139.31, 140.02, 145.94, 198.22; MS (m/z) 343 ( $M^+$ ). Anal. Calcd. for  $C_{23}H_{21}NO_2$ : Elemental Analysis: C, 80.44; H, 6.16; N, 4.08; Found: C, 80.47; H, 6.18; N, 4.11.

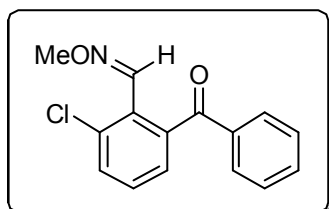

**(3e) 2-benzoyl-6-chlorobenzaldehyde O-methyl oxime.** TLC  $R_f$  = 0.50 (petroleum ether/ ethyl acetate, 12/1); Yield: 49%; yellow solid; m.p.: 106.1-107.5 °C;  $^1H$  NMR (400 MHz,  $CDCl_3$ ):  $\delta$  3.60 (s, 3H), 7.30 (d,  $J$  = 7.6 Hz, 1H), 7.41 (t,  $J$  = 7.2 Hz, 3H), 7.53 (d,  $J$  = 6.8 Hz, 1H), 7.54 (t,  $J$  = 6.8 Hz, 1H), 7.71 (d,  $J$  = 7.6 Hz, 2H), 8.29 (s, 1H);  $^{13}C$  NMR(100 MHz,  $CDCl_3$ ):  $\delta$  62.32, 127.13, 128.28, 128.62 (2C), 129.46 (2C), 130.37, 131.25, 133.12, 134.60, 137.57, 141.21, 143.94, 196.52; HRMS (EI) m/z calcd. for  $C_{15}H_{12}ClNO_2$ : 273.0557, found 273.0559; Anal. Calcd. for  $C_{15}H_{12}ClNO_2$ : Elemental Analysis: C, 65.82; H, 4.42; N, 5.12;

Found: C, 65.97; H, 4.51; N, 5.00.

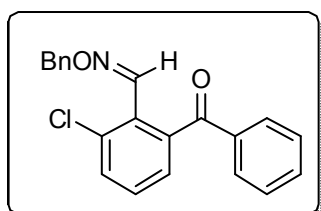

**(3f) 2-benzoyl-6-chlorobenzaldehyde O-benzyl oxime.** TLC  $R_f$  = 0.46 (petroleum ether/ ethyl acetate, 12/1); Yield: 43%; yellow solid; m.p.: 87.6-89.0 °C;  $^1H$  NMR (400 MHz,  $CDCl_3$ ):  $\delta$  4.78 (s, 2H), 7.05-7.08 (m, 2H), 7.25-7.27 (m, 4H), 7.40 (t,  $J$  = 7.6 Hz, 3H), 7.51 (d,  $J$  = 8.0 Hz, 1H), 7.54 (t,  $J$  = 7.2 Hz, 1H), 7.69 (d,  $J$  = 7.6 Hz, 2H), 8.39 (s, 1H);  $^{13}C$  NMR(100 MHz,  $CDCl_3$ ):  $\delta$  76.89, 126.86, 128.19, 128.49 (2C), 128.60, 128.64 (2C), 128.68 (2C), 129.55(2C), 130.31, 131.12, 133.10, 134.69, 136.87, 137.36, 141.19, 144.44, 196.30; MS (m/z) 349 ( $M^+$ ). Anal. Calcd. for  $C_{21}H_{16}ClNO_2$ : Elemental Analysis: C, 72.10; H, 4.61; N, 4.00;

Found: C, 72.07; H, 4.64; N, 3.92.

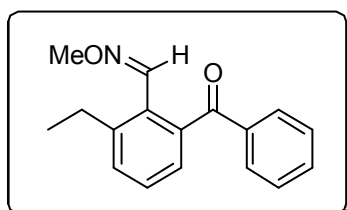

**(3g) 2-benzoyl-6-ethylbenzaldehyde O-methyl oxime.** TLC  $R_f$  = 0.40 (petroleum ether/ ethyl acetate, 12/1); Yield: 70%; yellow oil;  $^1H$  NMR (400 MHz,  $CDCl_3$ ):  $\delta$  1.24 (t,  $J$  = 7.6 Hz, 3H), 2.78 (q,  $J$  = 7.6 Hz, 2H), 3.65 (s, 3H), 7.26 (d,  $J$  = 8.0 Hz, 1H), 7.35-7.42 (m, 4H), 7.52 (t,  $J$  = 7.6 Hz, 1H), 7.72 (d,  $J$  = 7.6 Hz, 2H), 8.20 (s, 1H);  $^{13}C$  NMR(100 MHz,  $CDCl_3$ ):  $\delta$  15.80, 26.76, 62.00, 126.60, 128.26, 128.46 (2C), 129.29, 129.62 (2C), 130.84, 132.81, 138.18, 140.11, 143.91, 145.26, 198.19; MS (m/z) 267 ( $M^+$ ). Anal. Calcd. for  $C_{17}H_{17}NO_2$ : Elemental Analysis: C, 76.38; H, 6.41; N, 5.24; Found: C, 76.43; H, 6.45; N, 5.14.

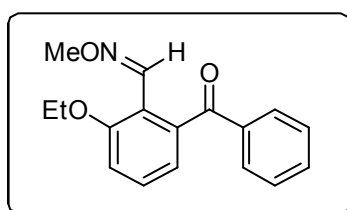

**(3h) 2-benzoyl-6-ethoxybenzaldehyde O-methyl oxime.** TLC  $R_f$  = 0.35 (petroleum ether/ ethyl acetate, 12/1); Yield: 79%; yellow oil;  $^1H$  NMR (400 MHz,  $CDCl_3$ ):  $\delta$  1.42 (t,  $J$  = 7.6 Hz, 3H), 3.56 (s, 3H), 4.09 (q,  $J$  = 6.8 Hz, 2H), 6.95 (d,  $J$  = 7.6 Hz, 1H), 7.00 (d,  $J$  = 8.0 Hz, 1H), 7.26-7.42 (m, 3H), 7.50 (t,  $J$  = 7.6 Hz, 1H), 7.72 (t,  $J$  = 8.0 Hz, 2H), 8.28 (s, 1H);  $^{13}C$  NMR(100 MHz,  $CDCl_3$ ):  $\delta$  14.87, 61.85, 64.50, 113.08, 118.80, 120.40, 128.34 (2C), 129.35 (2C), 130.71, 132.66, 137.92, 140.31, 142.85, 157.19, 197.62; IR (neat) 2924, 1725, 1644, 1254, 1044, 773, 696  $cm^{-1}$ ; MS (m/z) 283 ( $M^+$ ). Anal. Calcd. for

C<sub>17</sub>H<sub>17</sub>NO<sub>3</sub>: Elemental Analysis: C, 72.07; H, 6.05; N, 4.94; Found: C, 72.17; H, 6.08; N, 4.91.

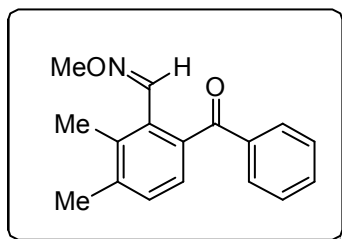

**(3i) 6-benzoyl-2,3-dimethylbenzaldehyde O-methyl oxime.** TLC R<sub>f</sub> = 0.40 (petroleum ether/ ethyl acetate, 12/1); Yield: 73%; yellow oil; <sup>1</sup>H NMR (400 MHz, CDCl<sub>3</sub>): δ 2.25 (s, 3H), 2.29 (s, 3H), 3.59 (s, 3H), 7.12 (d, *J* = 7.6 Hz, 1H), 7.18 (d, *J* = 7.6 Hz, 1H), 7.32 (t, *J* = 8.0 Hz, 2H), 7.44 (t, *J* = 7.6 Hz, 1H), 7.64 (d, *J* = 7.6 Hz, 2H), 8.17 (s, 1H); <sup>13</sup>C NMR(100 MHz, CDCl<sub>3</sub>): δ 16.11, 20.83, 61.97, 126.53, 128.43, 129.49 (2C), 129.70 (2C), 130.52, 132.70, 136.29, 137.95, 138.51, 139.79, 146.75, 198.13; MS (m/z) 267 (M<sup>+</sup>). Anal. Calcd. for C<sub>17</sub>H<sub>17</sub>NO<sub>2</sub>: Elemental Analysis: C, 76.38; H, 6.41; N, 5.24; Found: C, 76.37; H, 6.48; N, 5.19.

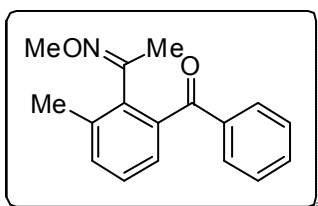

**(3j) (2-(1-(methoxyimino)ethyl)-3-methylphenyl)(phenyl)methanone.** TLC R<sub>f</sub> = 0.43 (petroleum ether/ ethyl acetate, 12/1); Yield: 35%; yellow oil; <sup>1</sup>H NMR (400 MHz, CDCl<sub>3</sub>): δ 2.04 (s, 3H), 2.35 (s, 3H), 3.72 (s, 3H), 7.27-7.29 (m, 2H), 7.30 (t, *J* = 7.2 Hz, 1H), 7.35 (t, *J* = 7.6 Hz, 1H), 7.43 (t, *J* = 8.0 Hz, 1H), 7.55 (t, *J* = 7.6 Hz, 1H), 7.76 (d, *J* = 7.6 Hz, 2H); <sup>13</sup>C NMR(100 MHz, CDCl<sub>3</sub>): δ 17.56, 19.78, 61.74, 126.72, 127.90, 128.38 (2C), 130.22 (2C), 132.89, 132.95, 136.96, 137.21, 138.32, 139.80, 156.76, 198.11; MS (m/z) 267 (M<sup>+</sup>). Anal. Calcd. for C<sub>17</sub>H<sub>17</sub>NO<sub>2</sub>: Elemental Analysis: C, 76.38; H, 6.41; N, 5.24; Found: C, 76.44; H, 6.48; N, 5.17.

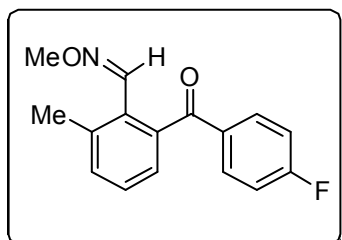

**(4a) 2-(4-fluorobenzoyl)-6-methylbenzaldehyde O-methyl oxime.** TLC R<sub>f</sub> = 0.42 (petroleum ether/ ethyl acetate, 12/1); Yield: 63%; colorless solid; m.p.: 107.5-110.3 °C; <sup>1</sup>H NMR (400 MHz, CDCl<sub>3</sub>): δ 2.46 (s, 3H), 3.66 (s, 3H), 7.07 (d, *J* = 8.8 Hz, 1H), 7.10 (d, *J* = 6.8 Hz, 1H), 7.23 (d, *J* = 6.8 Hz, 1H), 7.33-7.38 (m, 2H), 7.74-7.77 (m, 2H), 8.18 (s, 1H); <sup>13</sup>C NMR(100 MHz, CDCl<sub>3</sub>): δ 20.83, 62.05, 115.59 (d, *J*<sub>C-F</sub> = 21.8 Hz, 2C), 128.82 (d, *J*<sub>C-F</sub> = 34.3 Hz, 1C), 129.10, 131.07, 132.18 (d, *J*<sub>C-F</sub> = 9.1 Hz, 2C), 132.52, 134.51, 137.87, 139.59, 145.39, 165.14 (d, *J*<sub>C-F</sub> = 252.9 Hz, 1C), 196.57; MS (m/z) 271 (M<sup>+</sup>). Anal. Calcd. for C<sub>16</sub>H<sub>14</sub>FNO<sub>2</sub>: Elemental Analysis: C, 70.84; H, 5.20; N, 5.16; Found: C, 70.77; H, 5.27; N, 5.09.

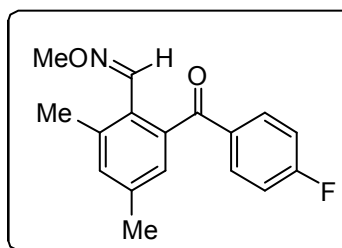

**(4b) 2-(4-fluorobenzoyl)-4,6-dimethylbenzaldehyde O-methyl oxime.** TLC R<sub>f</sub> = 0.41 (petroleum ether/ ethyl acetate, 12/1); Yield: 65%; colorless solid; m.p.: 107.9-109.1 °C; <sup>1</sup>H NMR (400 MHz, CDCl<sub>3</sub>): δ 2.36 (s, 3H), 2.42 (s, 3H), 3.64 (s, 3H), 7.03 (d, *J* = 8.4 Hz, 1H), 7.07 (s, 1H), 7.08 (d, *J* = 8.8 Hz, 1H), 7.15 (s, 1H), 7.74 (d, *J* = 7.2 Hz, 1H), 7.76 (d, *J* = 7.2 Hz, 1H), 8.14 (s, 1H); <sup>13</sup>C NMR(100 MHz, CDCl<sub>3</sub>): δ 20.29, 21.31, 61.94, 115.52 (d, *J*<sub>C-F</sub> = 21.8 Hz, 2C), 125.78, 126.90, 132.19, 133.14 (d, *J*<sub>C-F</sub> = 9.2 Hz, 2C), 134.58 (d, *J*<sub>C-F</sub> = 2.6 Hz, 1C), 137.73, 139.41, 139.62, 145.29, 165.61 (d, *J*<sub>C-F</sub> = 252.7 Hz, 1C), 196.76; IR (neat) 2923, 2853, 1725, 1644, 1254, 1044, 773 cm<sup>-1</sup>; HRMS (EI) m/z calcd. for C<sub>17</sub>H<sub>16</sub>FNO<sub>2</sub>: 285.1165, found 285.1162; Anal. Calcd. for C<sub>17</sub>H<sub>16</sub>FNO<sub>2</sub>: Elemental Analysis: C, 71.56; H, 5.65; N, 4.91; Found: C, 71.67; H, 5.77; N, 4.77.

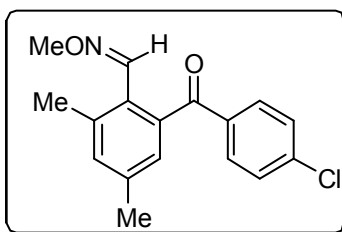

**(4c) 2-(4-chlorobenzoyl)-4,6-dimethylbenzaldehyde O-methyl oxime.** TLC R<sub>f</sub> = 0.41 (petroleum ether/ ethyl acetate, 12/1); Yield: 69%; colorless solid; m.p.: 111.5-113.3 °C; <sup>1</sup>H NMR (400 MHz, CDCl<sub>3</sub>): δ 2.36 (s, 3H), 2.41 (s, 3H), 3.64 (s, 3H), 7.02 (s, 1H), 7.15 (s, 1H), 7.37 (d, *J* = 8.8 Hz, 2H), 7.66 (d, *J* = 8.4 Hz, 2H), 8.13 (s, 1H); <sup>13</sup>C NMR(100 MHz, CDCl<sub>3</sub>): δ 20.26, 21.38, 62.04, 125.84, 127.01, 128.81 (2C), 130.96 (2C), 133.29, 136.65, 137.75, 139.14, 139.42, 139.54, 145.22, 197.13; MS (m/z) 301 (M<sup>+</sup>). Anal. Calcd. for C<sub>17</sub>H<sub>16</sub>ClNO<sub>2</sub>: Elemental Analysis: C, 67.66; H, 5.34; N, 4.64; Found: C, 67.57; H, 5.38; N, 4.69.

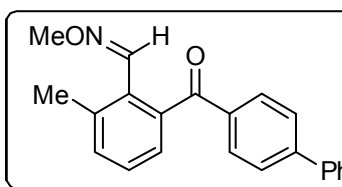

**(4d) 2-([1,1'-biphenyl]-4-carbonyl)-6-methylbenzaldehyde O-methyl oxime.** TLC R<sub>f</sub> = 0.40 (petroleum ether/ ethyl acetate, 12/1); Yield: 72%; colorless solid; m.p.: 87.1-89.5 °C; <sup>1</sup>H NMR (400 MHz, CDCl<sub>3</sub>): δ 2.47 (s, 3H), 3.69 (s, 3H), 7.25 (t, *J* = 7.2 Hz, 1H), 7.34-7.40 (m, 3H), 7.45 (t, *J* = 7.6 Hz, 2H), 7.61-7.64 (m, 4H), 7.81 (d, *J* = 7.6 Hz, 2H), 8.22 (s, 1H); <sup>13</sup>C NMR

(100 MHz, CDCl<sub>3</sub>):  $\delta$  20.54, 62.09, 126.47, 127.13 (2C), 127.43 (2C), 128.34, 128.82, 129.01 (2C), 129.10, 130.31 (2C), 132.38, 136.81, 137.85, 140.04, 140.11, 145.54, 145.66, 197.68; MS (m/z) 329 (M<sup>+</sup>). Anal. Calcd. for C<sub>22</sub>H<sub>19</sub>NO<sub>2</sub>: Elemental Analysis: C, 80.22; H, 5.81; N, 4.25; Found: C, 80.27; H, 5.84; N, 4.19.

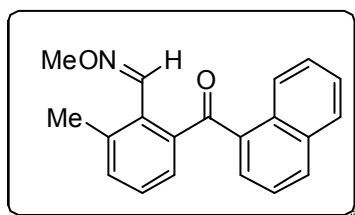

**(4e) 2-(1-naphthoyl)-6-methylbenzaldehyde O-methyl oxime.** TLC R<sub>f</sub> = 0.40 (petroleum ether/ ethyl acetate, 12/1); Yield: 70%; colorless solid; m.p.: 138.2-141.0 °C; <sup>1</sup>H NMR (400 MHz, CDCl<sub>3</sub>):  $\delta$  2.43 (s, 3H), 3.45 (s, 3H), 7.31-7.43 (m, 5H), 7.55 (t, *J* = 7.6 Hz, 1H), 7.64 (t, *J* = 7.6 Hz, 1H), 7.88 (d, *J* = 8.0 Hz, 1H), 7.96 (t, *J* = 8.0 Hz, 1H), 8.14 (s, 1H), 8.88 (d, *J* = 8.8 Hz, 1H); <sup>13</sup>C NMR(100 MHz, CDCl<sub>3</sub>):  $\delta$  20.33, 61.88, 124.31, 126.64, 126.78, 127.94, 127.95, 128.50, 129.02, 129.68, 130.00, 131.47, 132.93, 133.11, 134.06, 136.10, 137.96, 141.46, 146.40, 199.56; IR (neat) 2920, 1666, 1529, 1448, 1268, 1019, 973, 748, 696 cm<sup>-1</sup>; HRMS (EI) m/z calcd. for C<sub>20</sub>H<sub>17</sub>NO<sub>2</sub>: 303.1259, found 303.1263.

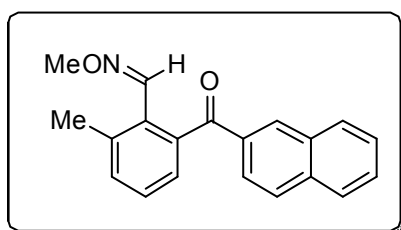

**(4f) 2-(2-naphthoyl)-6-methylbenzaldehyde O-methyl oxime.** TLC R<sub>f</sub> = 0.40 (petroleum ether/ ethyl acetate, 12/1); Yield: 67%; colorless solid; m.p.: 117.0-119.1 °C; <sup>1</sup>H NMR (400 MHz, CDCl<sub>3</sub>):  $\delta$  2.48 (s, 3H), 3.63 (s, 3H), 7.31 (d, *J* = 4.8 Hz, 1H), 7.33-7.41 (m, 2H), 7.50 (t, *J* = 7.6 Hz, 1H), 7.55 (t, *J* = 7.6 Hz, 1H), 7.82-7.89 (m, 3H), 7.97 (d, *J* = 8.4 Hz, 1H), 8.07 (s, 1H), 8.20 (s, 1H); <sup>13</sup>C NMR(100 MHz, CDCl<sub>3</sub>):  $\delta$  20.50, 62.05, 125.17, 126.59, 126.77, 127.96, 128.41, 128.49, 128.92, 129.02, 129.68, 131.58, 132.41, 132.58, 135.59, 135.61, 137.88, 140.08, 145.56, 198.14; MS (m/z) 303 (M<sup>+</sup>). Anal. Calcd. for C<sub>20</sub>H<sub>17</sub>NO<sub>2</sub>: Elemental Analysis: C, 79.19; H, 5.65; N, 4.62; Found: C, 79.22; H, 5.59; N, 4.61.

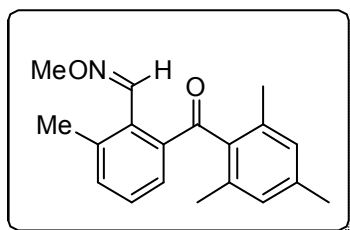

**(4g) 2-methyl-6-(2,4,6-trimethylbenzoyl)benzaldehyde O-methyl oxime.** TLC R<sub>f</sub> = 0.42 (petroleum ether/ ethyl acetate, 12/1); Yield: 85%; colorless solid; m.p.: 89.5-90.3 °C; <sup>1</sup>H NMR (400 MHz, CDCl<sub>3</sub>):  $\delta$  2.09 (s, 6H), 2.31 (s, 3H), 2.50 (s, 3H), 3.95 (s, 3H), 6.86 (s, 2H), 7.23 (t, *J* = 7.6 Hz, 1H), 7.26 (d, *J* = 7.6 Hz, 1H), 7.41 (d, *J* = 6.8 Hz, 1H), 8.53 (s, 1H); <sup>13</sup>C NMR(100 MHz, CDCl<sub>3</sub>):  $\delta$  19.81 (2C), 21.29, 21.33, 61.99, 128.76 (4C), 129.27, 131.34, 134.98, 135.29, 137.47, 138.78, 139.02, 139.09, 149.02, 201.57; IR (neat) 2955, 2815, 1659, 1609, 1602, 1455, 1265, 1051, 914, 850 cm<sup>-1</sup>; MS (m/z) 295 (M<sup>+</sup>). Anal. Calcd. for C<sub>19</sub>H<sub>21</sub>NO<sub>2</sub>: Elemental Analysis: C, 77.26; H, 7.17; N, 4.74; Found: C, 77.27; H, 7.21; N, 4.70.

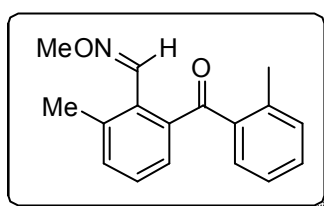

**(4h) 2-methyl-6-(2-methylbenzoyl)benzaldehyde O-methyl oxime.** TLC R<sub>f</sub> = 0.41 (petroleum ether/ ethyl acetate, 12/1); Yield: 68%; yellow oil; <sup>1</sup>H NMR (400 MHz, CDCl<sub>3</sub>):  $\delta$  2.44 (s, 3H), 2.58 (s, 3H), 3.77 (s, 3H), 7.12 (t, *J* = 7.6 Hz, 1H), 7.20 (d, *J* = 7.6 Hz, 2H), 7.28-7.33 (m, 2H), 7.34 (d, *J* = 8.8 Hz, 1H), 7.36 (t, *J* = 7.6 Hz, 1H), 8.19 (s, 1H); <sup>13</sup>C NMR(100 MHz, CDCl<sub>3</sub>):  $\delta$  20.54, 21.55, 62.00, 125.48, 127.64, 128.97, 129.57, 130.08, 130.71, 131.62, 131.76, 132.97, 138.03, 139.63, 141.11, 146.89, 199.75; MS (m/z) 267 (M<sup>+</sup>). Anal. Calcd. for C<sub>17</sub>H<sub>17</sub>NO<sub>2</sub>: Elemental Analysis: C, 76.38; H, 6.41; N, 5.24; Found: C, 76.42; H, 6.44; N, 5.21.

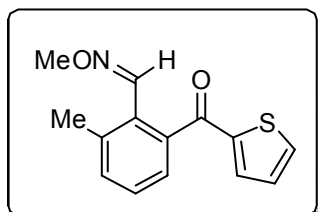

**(4i) 2-methyl-6-(thiophene-2-carbonyl)benzaldehyde O-methyl oxime.** TLC R<sub>f</sub> = 0.37 (petroleum ether/ ethyl acetate, 12/1); Yield: 64%; yellow solid; m.p.: 83.8-86.5 °C; <sup>1</sup>H NMR (400 MHz, CDCl<sub>3</sub>):  $\delta$  2.47 (s, 3H), 3.76 (s, 3H), 7.05 (t, *J* = 4.4 Hz, 1H), 7.30-7.35 (m, 4H), 7.66 (d, *J* = 4.8 Hz, 1H), 8.26 (s, 1H); <sup>13</sup>C NMR(100 MHz, CDCl<sub>3</sub>):  $\delta$  20.76, 62.18, 126.17, 128.12, 128.68, 128.84, 132.66, 134.35, 134.66, 138.11, 139.71, 145.29, 145.83, 190.19; IR (neat) 2945, 2906, 1641, 1602, 1518, 1483, 1377, 1314, 1272, 1052, 798, 696 cm<sup>-1</sup>; HRMS (EI) m/z calcd for C<sub>14</sub>H<sub>13</sub>NO<sub>2</sub>S: 259.0667, found 259.0669; Anal. Calcd. for C<sub>14</sub>H<sub>13</sub>NO<sub>2</sub>S: Elemental Analysis: C, 64.84; H, 5.05; N, 5.40; Found: C, 64.95; H, 5.17; N, 5.27.

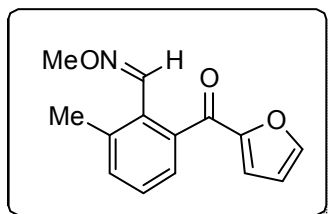

**(4j) 2-(furan-2-carbonyl)-6-methylbenzaldehyde O-methyl oxime.** TLC  $R_f$  = 0.38 (petroleum ether / ethyl acetate, 12/1); Yield: 60%; yellow solid; m.p.: 75.5-78.3 °C;  $^1\text{H}$  NMR (400 MHz,  $\text{CDCl}_3$ ):  $\delta$  2.46 (s, 3H), 3.74 (s, 3H), 6.51 (d,  $J$  = 4.0 Hz, 1H), 6.97 (d,  $J$  = 3.6 Hz, 1H), 7.26-7.34 (m, 3H), 7.60 (t,  $J$  = 1.2 Hz, 1H), 8.27 (s, 1H);  $^{13}\text{C}$  NMR(100 MHz,  $\text{CDCl}_3$ ):  $\delta$  20.63, 62.22, 112.44, 119.46, 126.57, 128.97, 132.98, 1337.15, 137.98, 138.85, 145.88, 146.85, 153.13, 185.28; MS ( $m/z$ ) 243 ( $\text{M}^+$ ). Anal. Calcd. for  $\text{C}_{14}\text{H}_{13}\text{NO}_3$ : Elemental Analysis: C, 69.12; H, 5.39; N, 5.76; Found: C,

69.22; H, 5.48; N, 5.69.

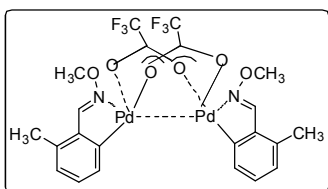

$\text{C}_{22}\text{H}_{20}\text{F}_6\text{N}_2\text{O}_6\text{Pd}_2$  was prepared according to the method reported by Chien-Hong Cheng.<sup>3</sup> To a suspension of palladium acetate (1 mmol, 0.224 g) in 5 mL TFA was added a solution of 2-methylbenzaldehyde O-methyl oxime (1 mmol, 0.149 g) in 5 mL TFA; the mixture was then kept at 50 °C for at least 5 h and concentrated via vacuum evaporation. After the residue was washed with MeOH several times, the crude product was isolated in 48% yield as a yellow solid.  $^1\text{H}$  NMR (400 MHz,  $\text{CDCl}_3$ ):  $\delta$  2.15 (s, 3H), 3.71 (s,

3H), 6.80-6.87 (m, 3H), 7.36 (s, 1H).

### III. References and notes:

1. C. J. MacNevin, R. L. Moore and D. C. Liotta, *J. Org. Chem.*, 2008, **73**, 1264.
2. K. Wadhwa, C. X. Yang, P. R. West, K. C. Deming, S. R. Chemburkar and R. E. Reddy, *Syn. Comm.*, 2008, **38**, 4434.
3. V. S. Thirunavukkarasu and C.-H. Cheng, *Chem.-Eur. J.* 2011, **17**, 14723.

## IV. $^1\text{H}$ and $^{13}\text{C}$ NMR Spectra

### $^1\text{H}$ and $^{13}\text{C}$ NMR Spectra for **3a**

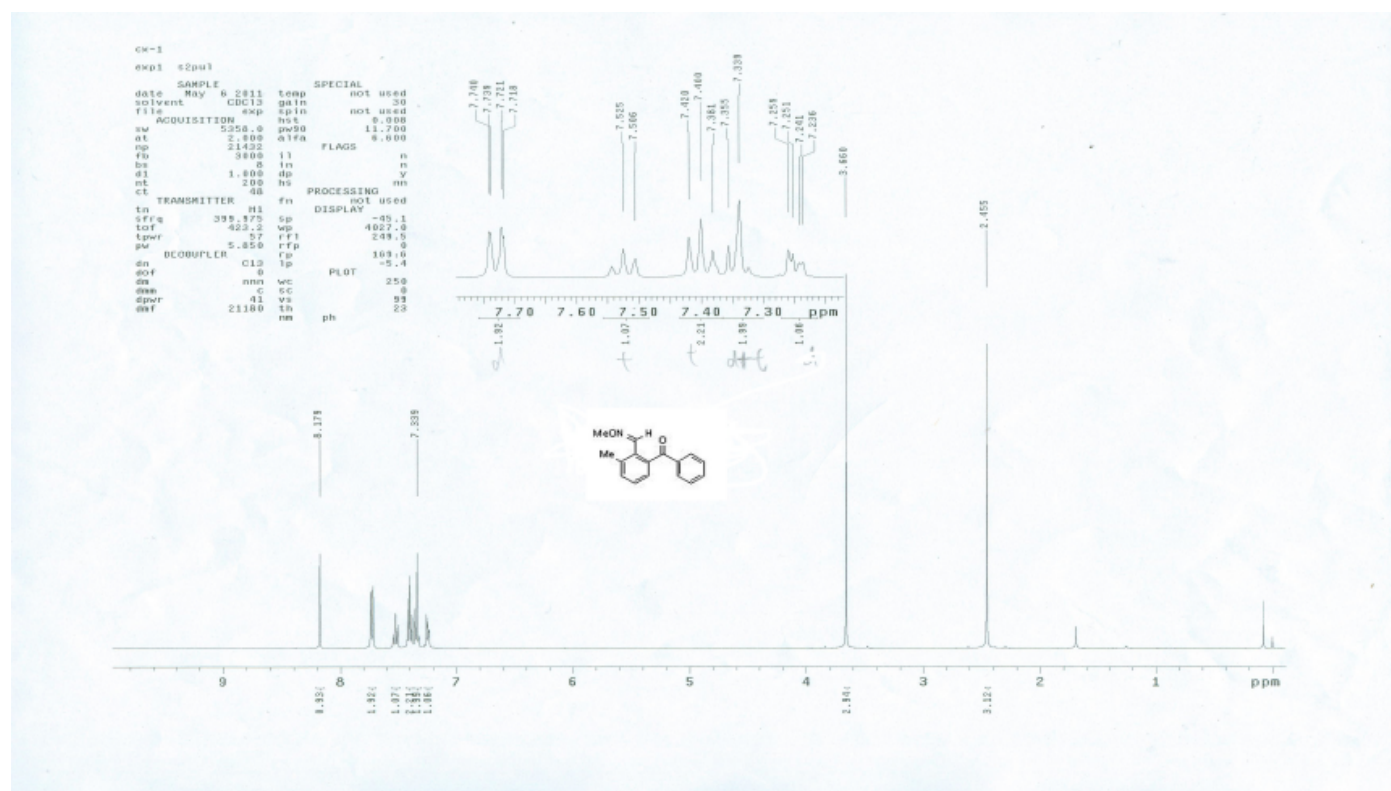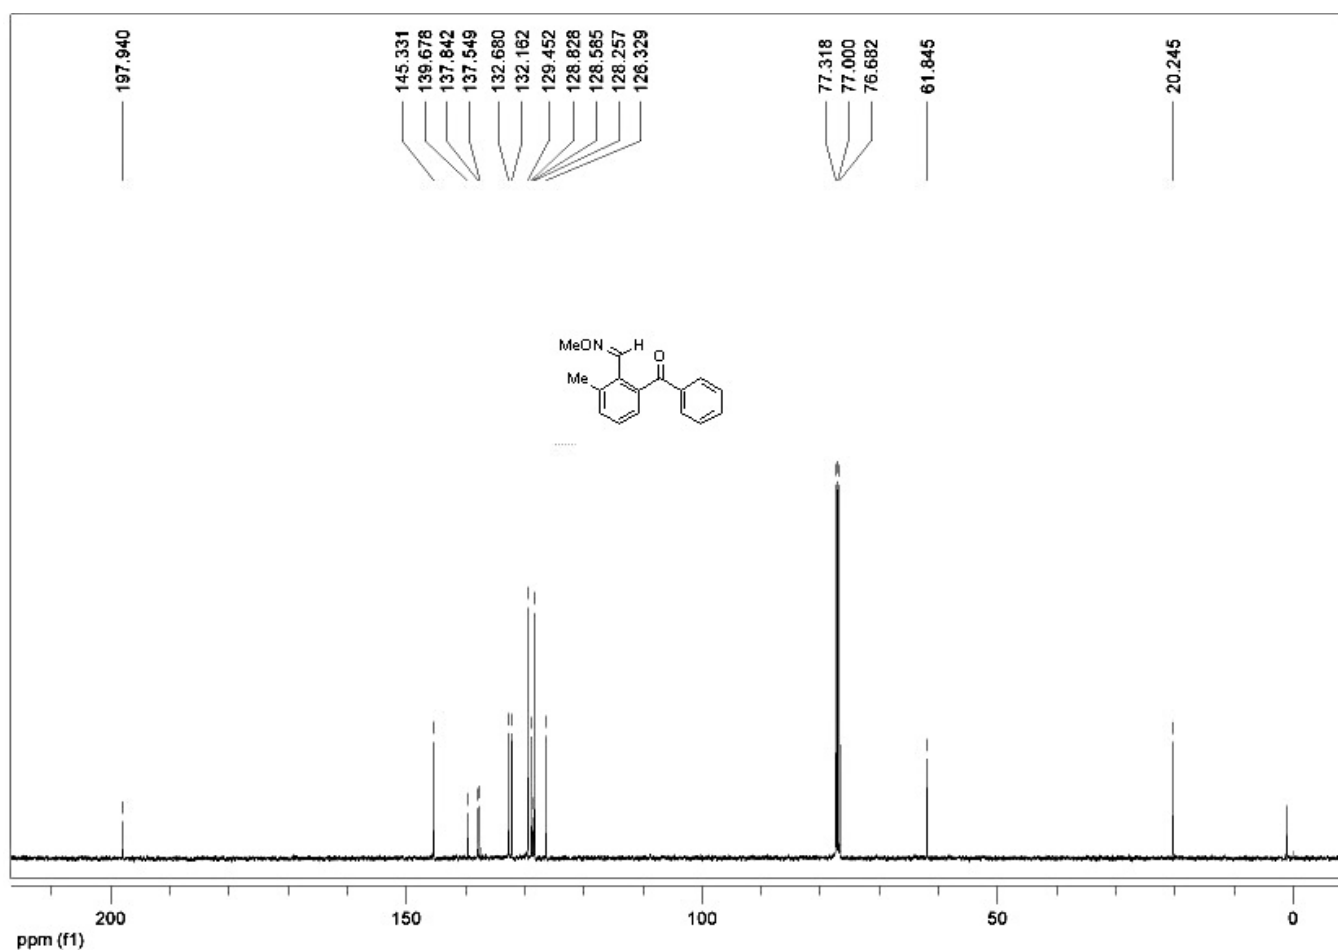

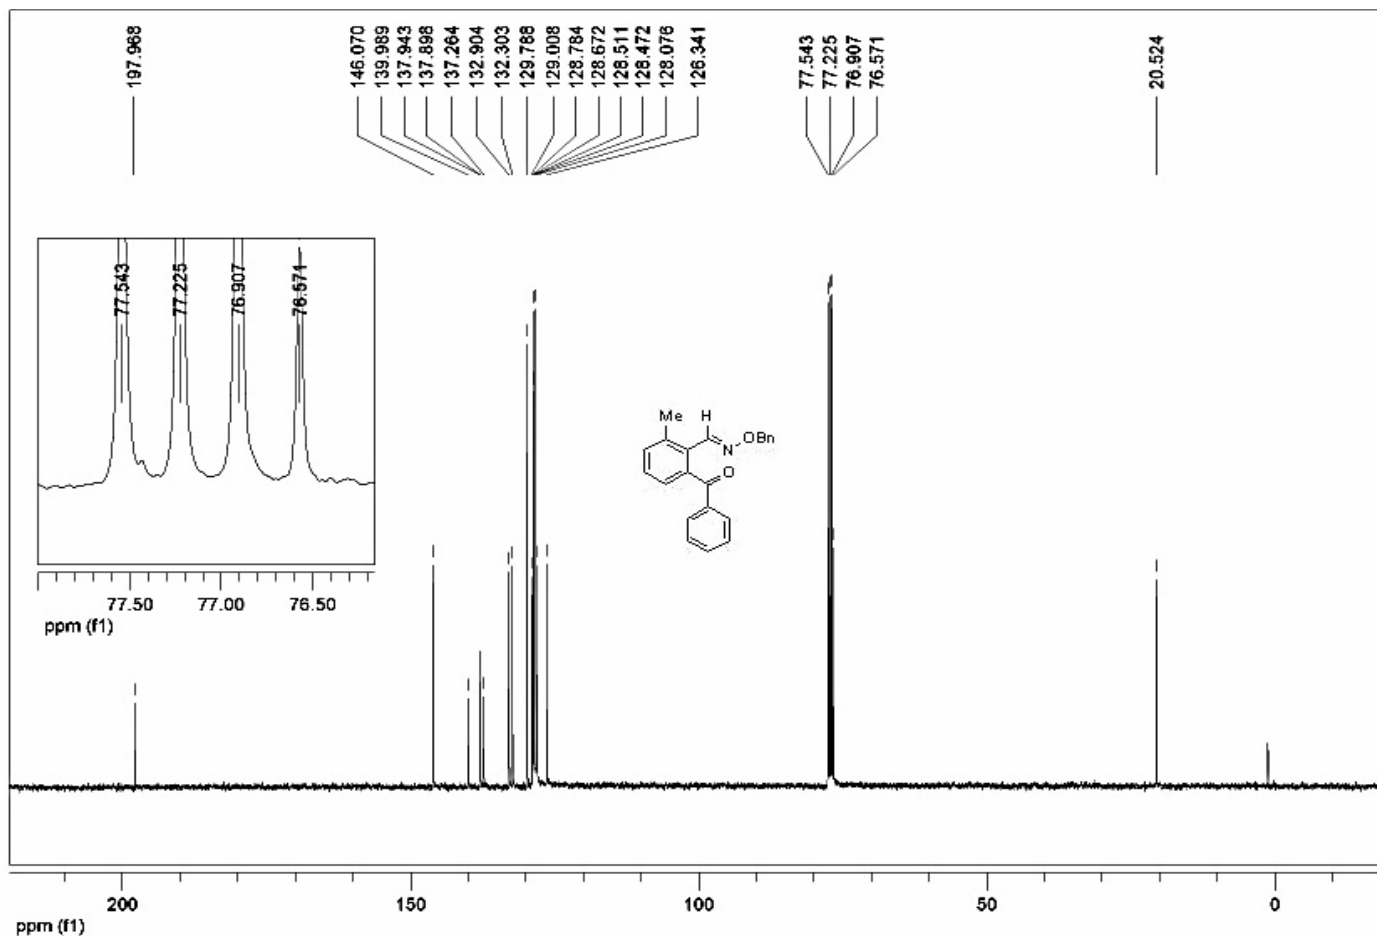

# <sup>1</sup>H and <sup>13</sup>C NMR Spectra for 3c

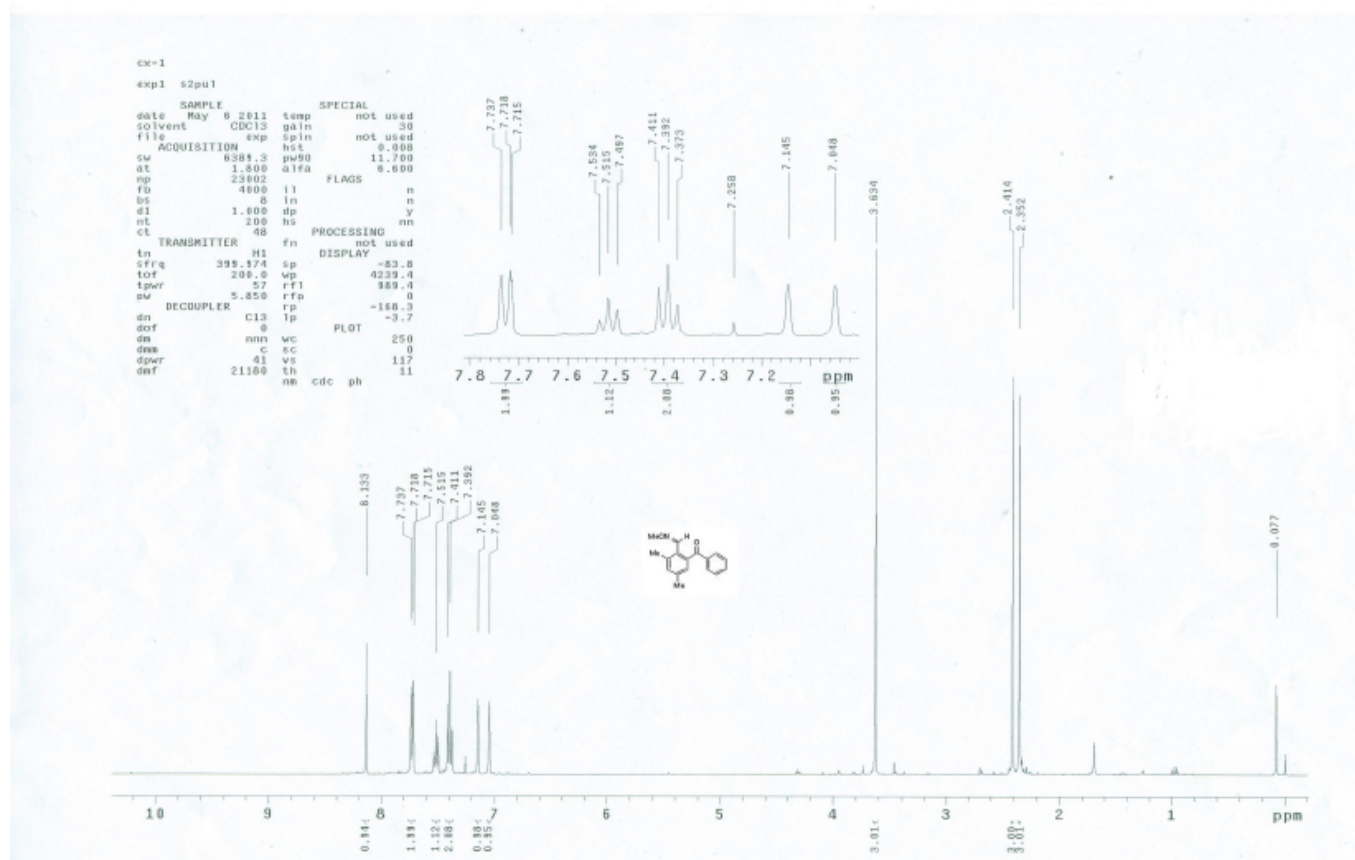

Yang-2

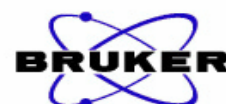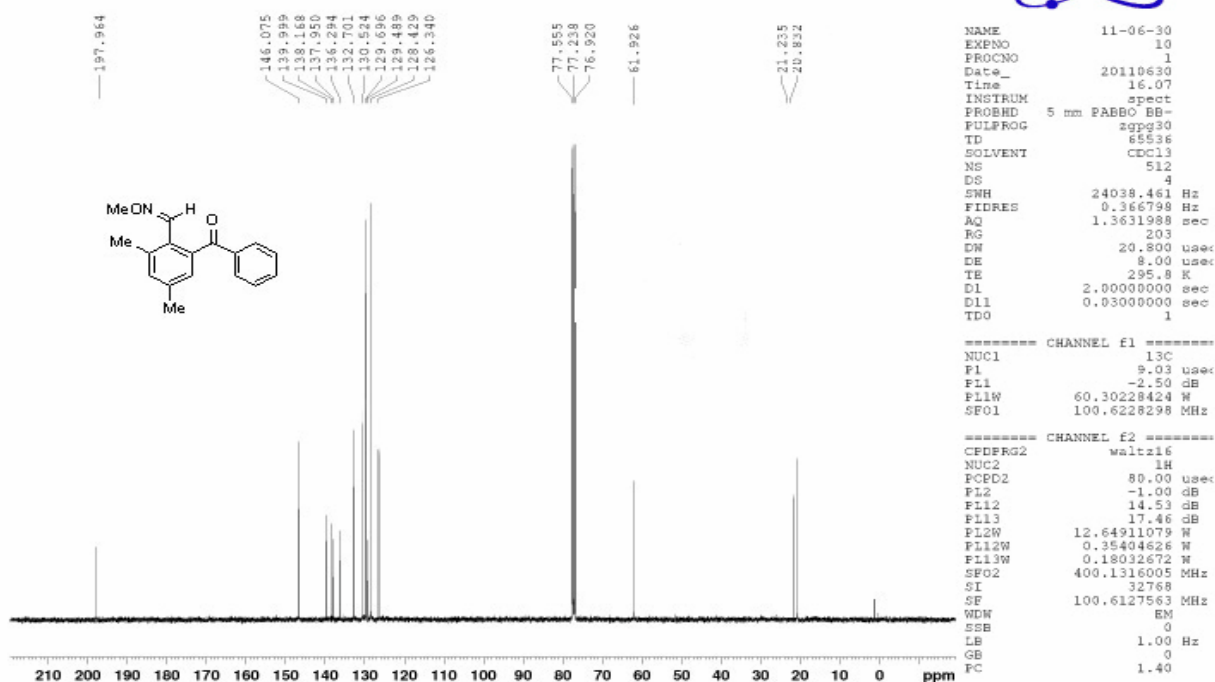

# <sup>1</sup>H and <sup>13</sup>C NMR Spectra for 3d

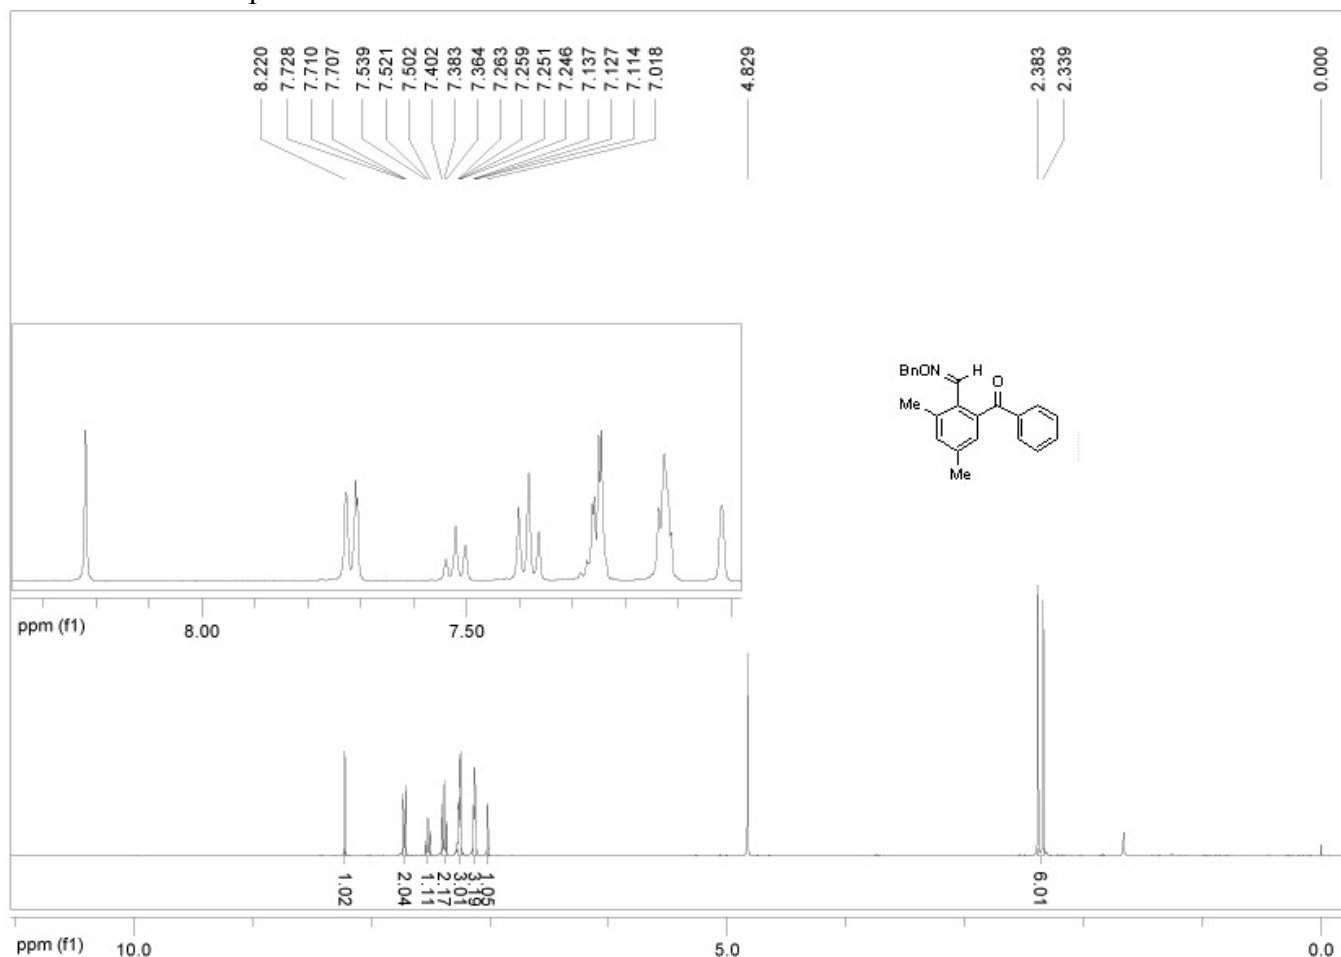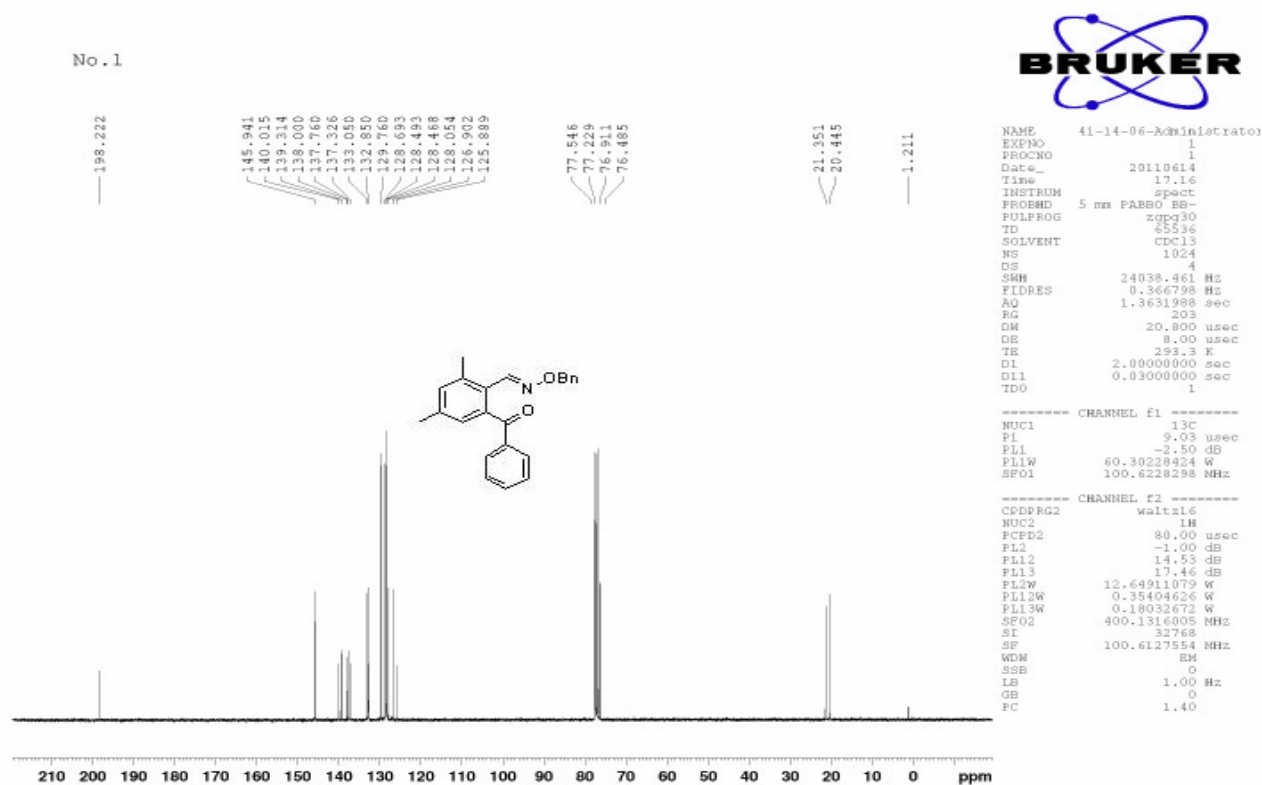

# <sup>1</sup>H and <sup>13</sup>C NMR Spectra for 3e

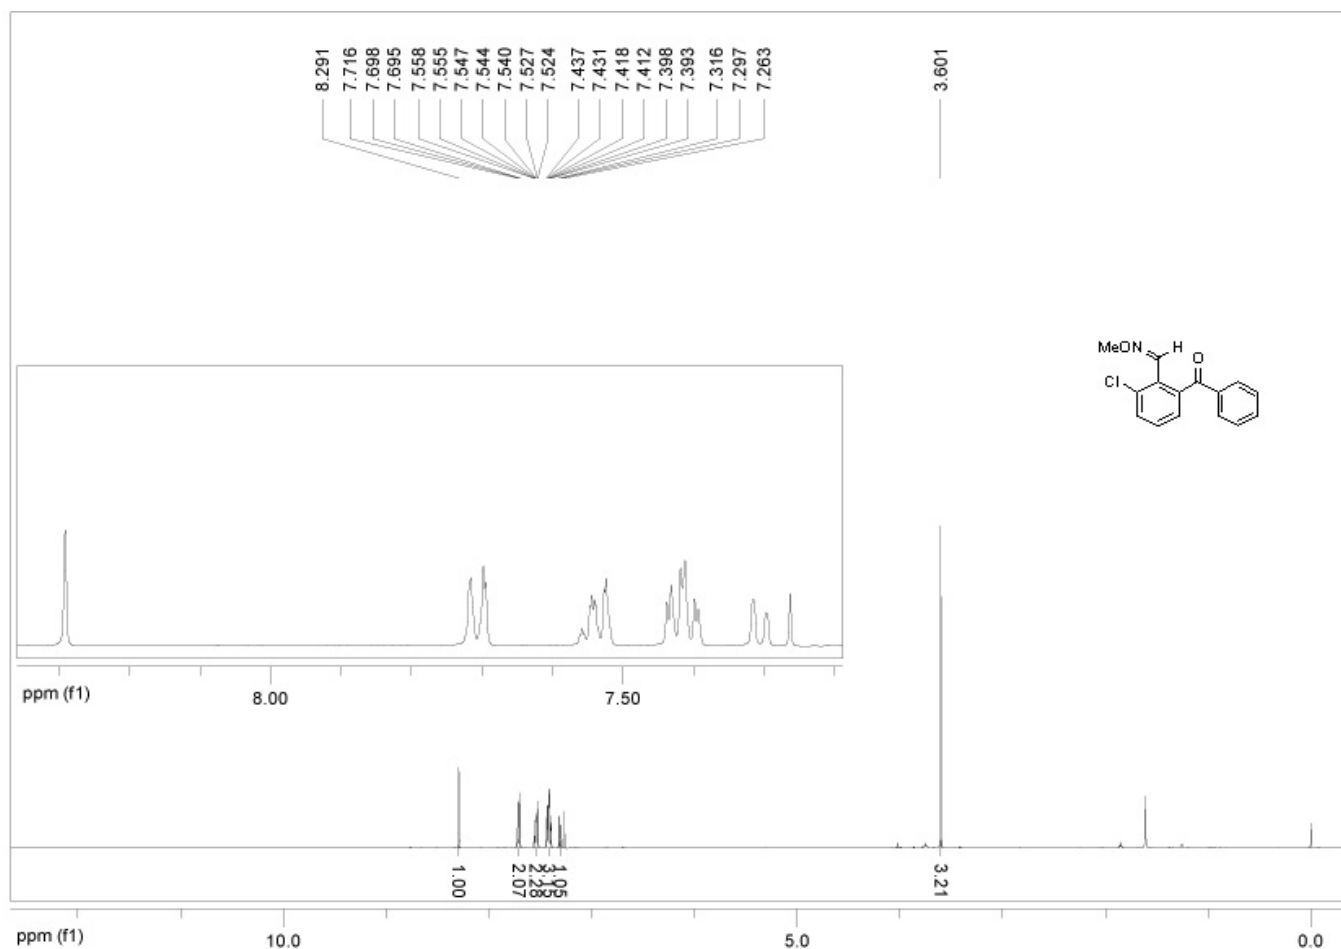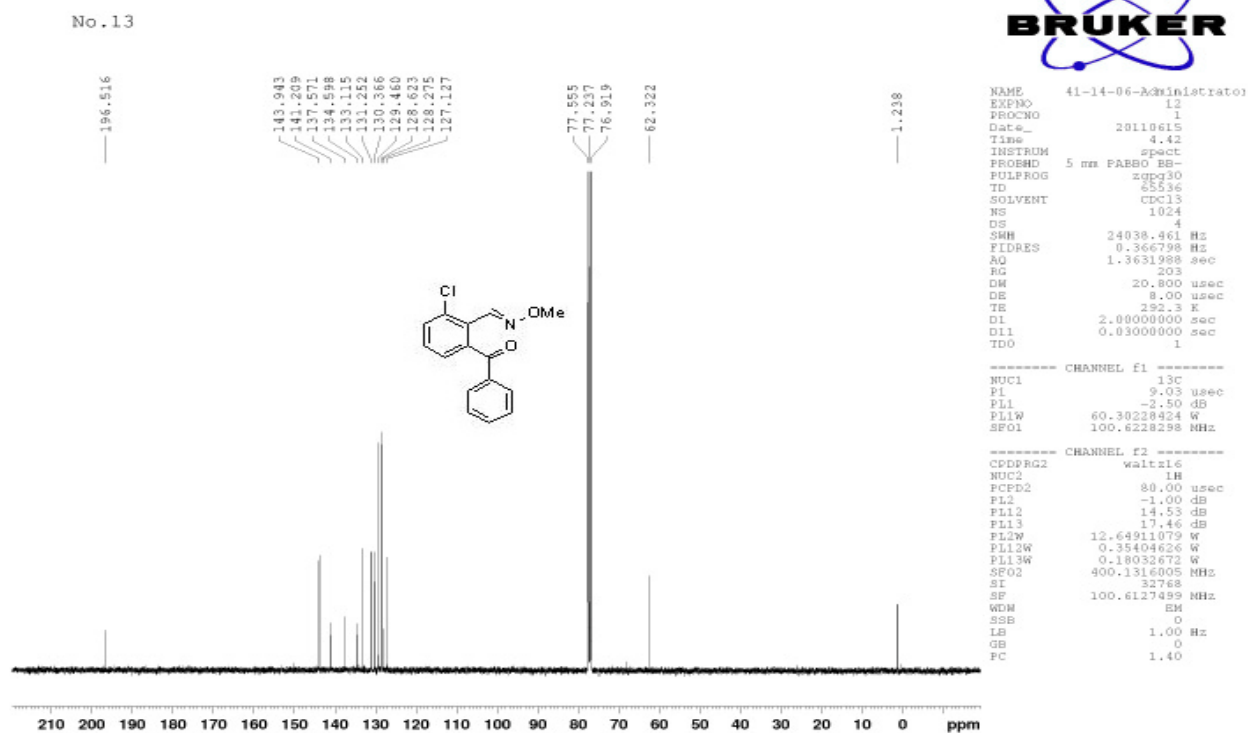

$^1\text{H}$  and  $^{13}\text{C}$  NMR Spectra for **3f**

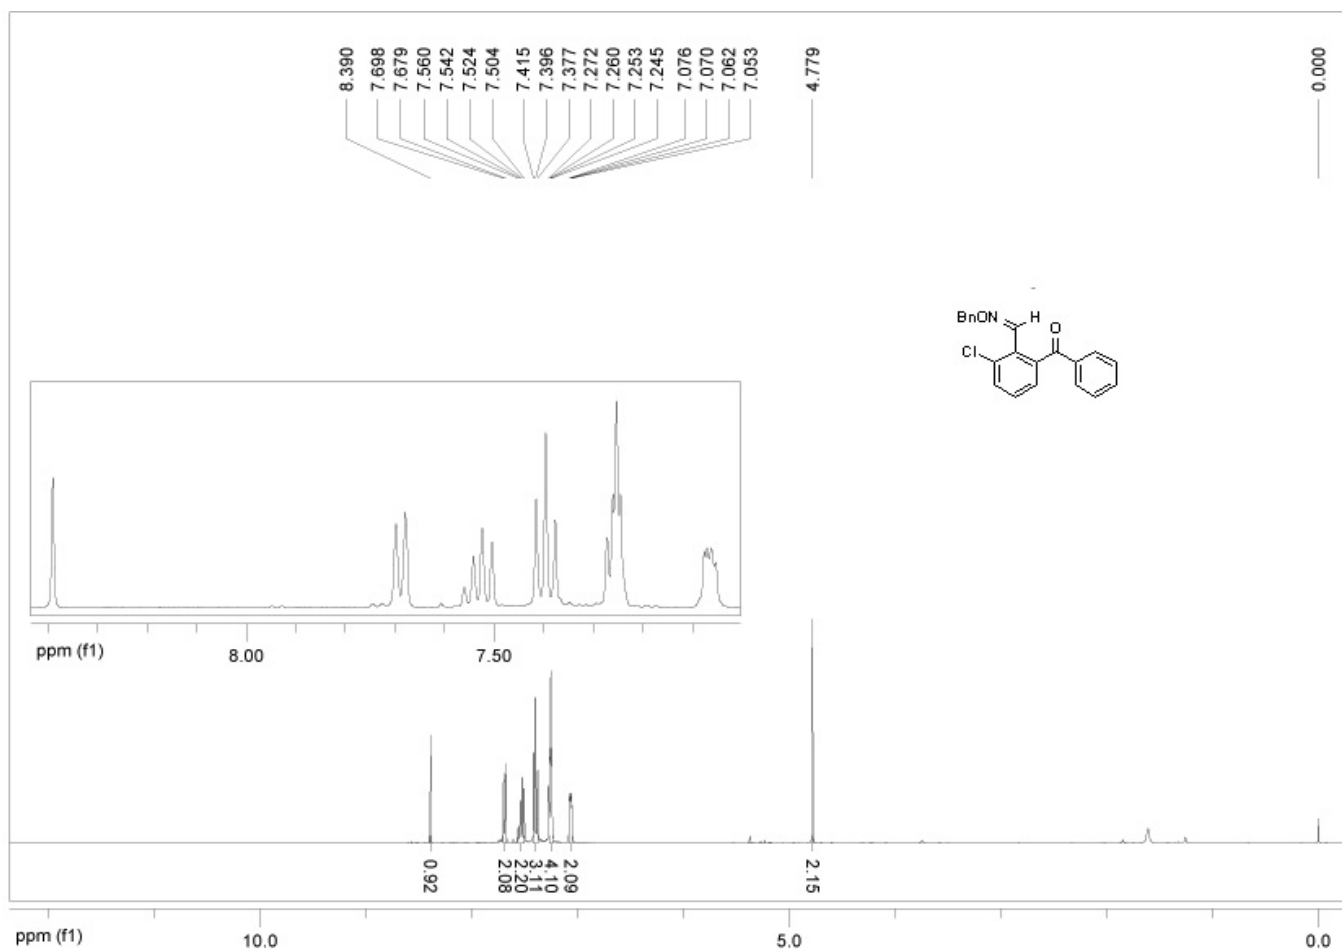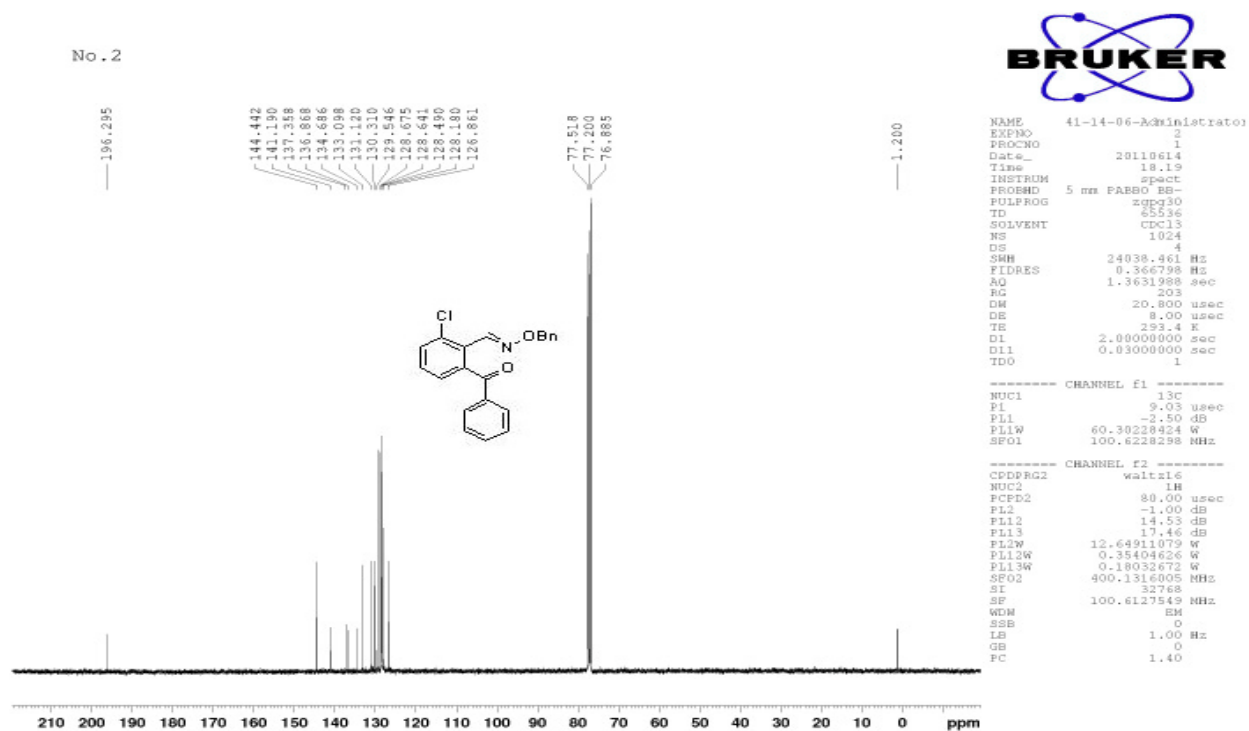

$^1\text{H}$  and  $^{13}\text{C}$  NMR Spectra for **3g**

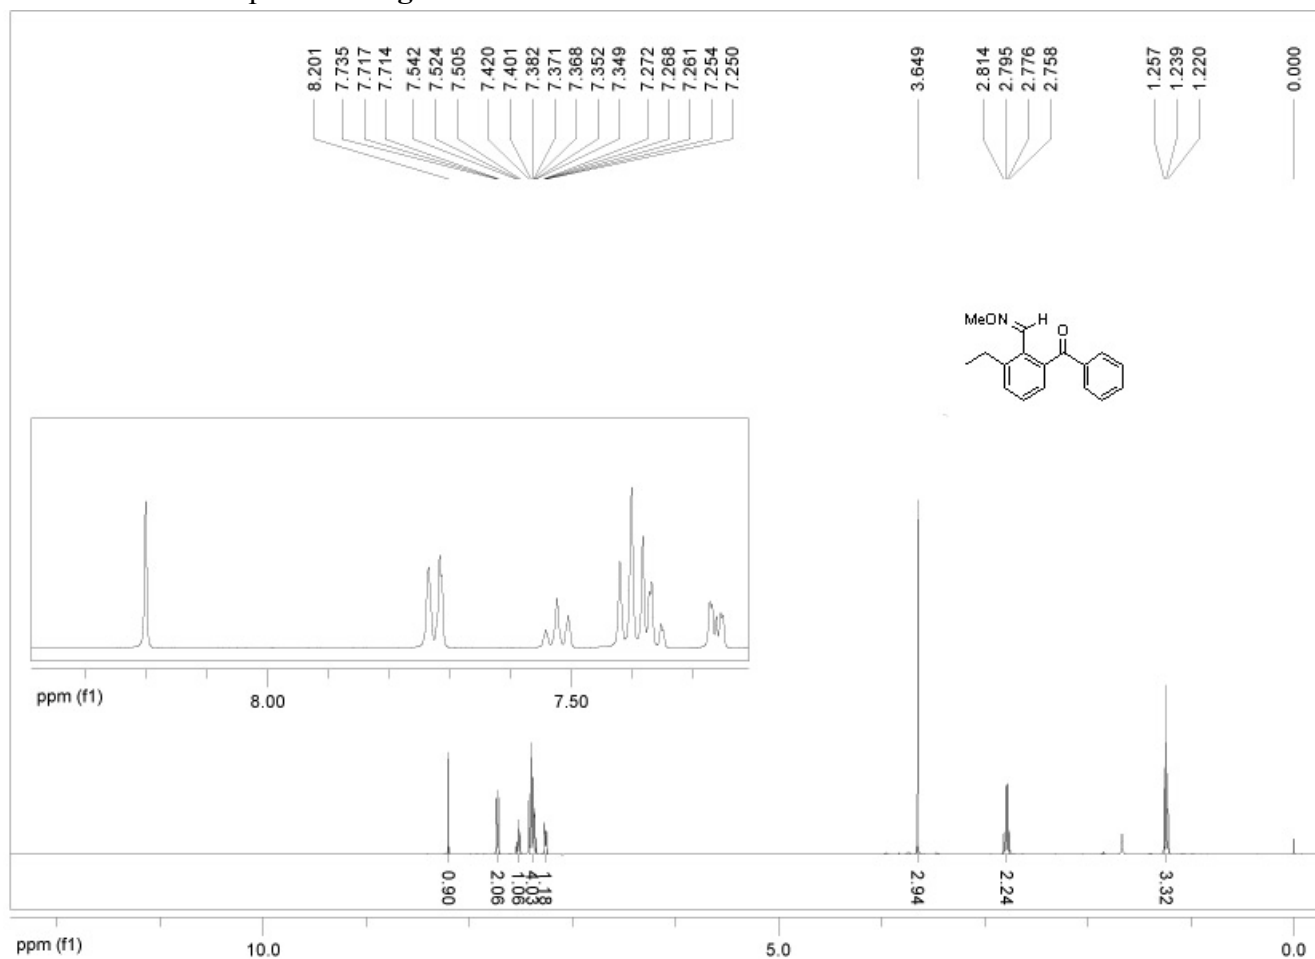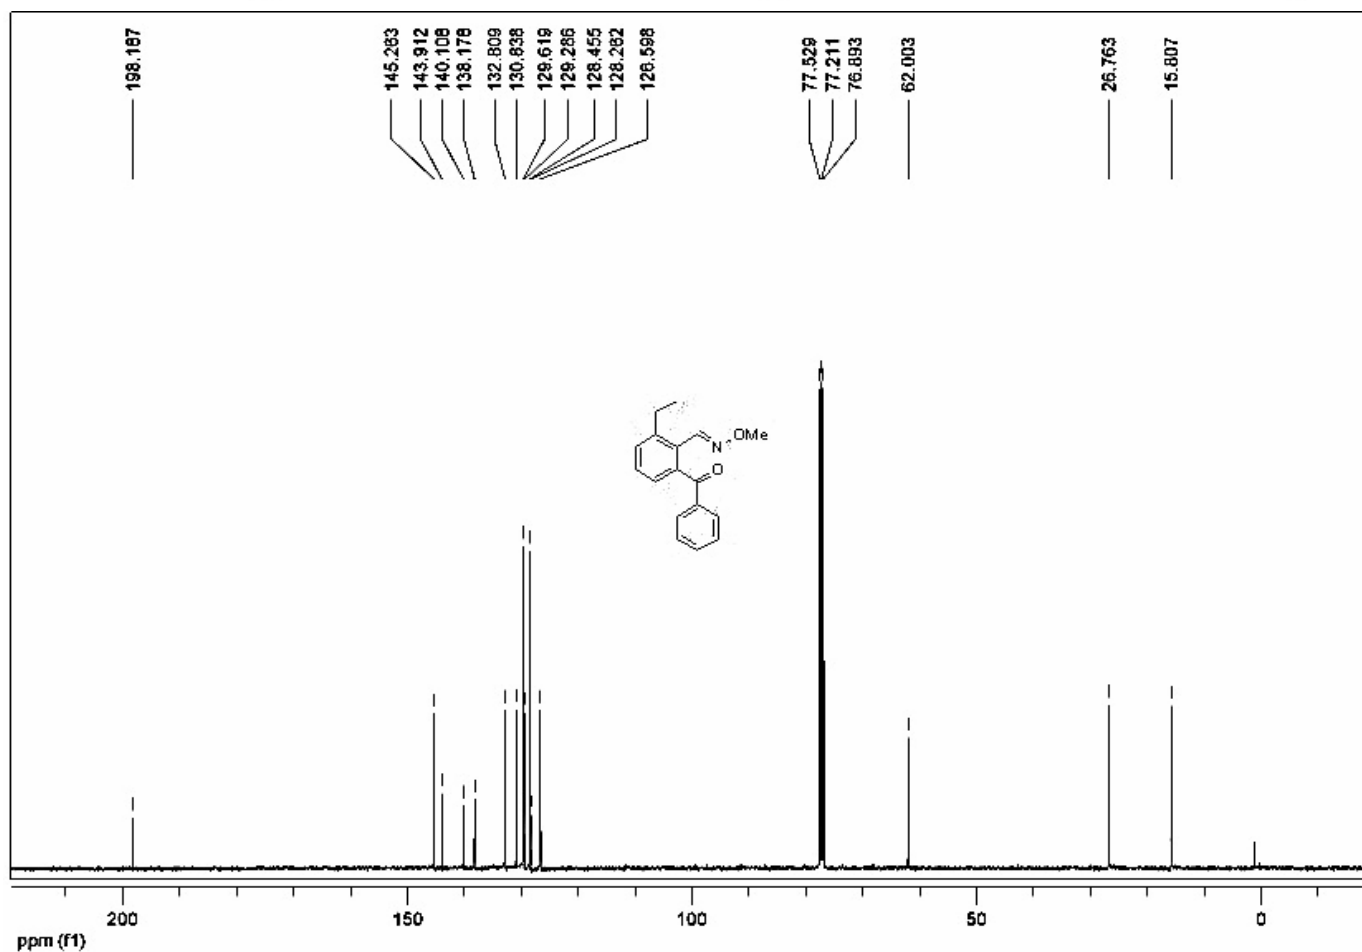

$^1\text{H}$  and  $^{13}\text{C}$  NMR Spectra for **3h**

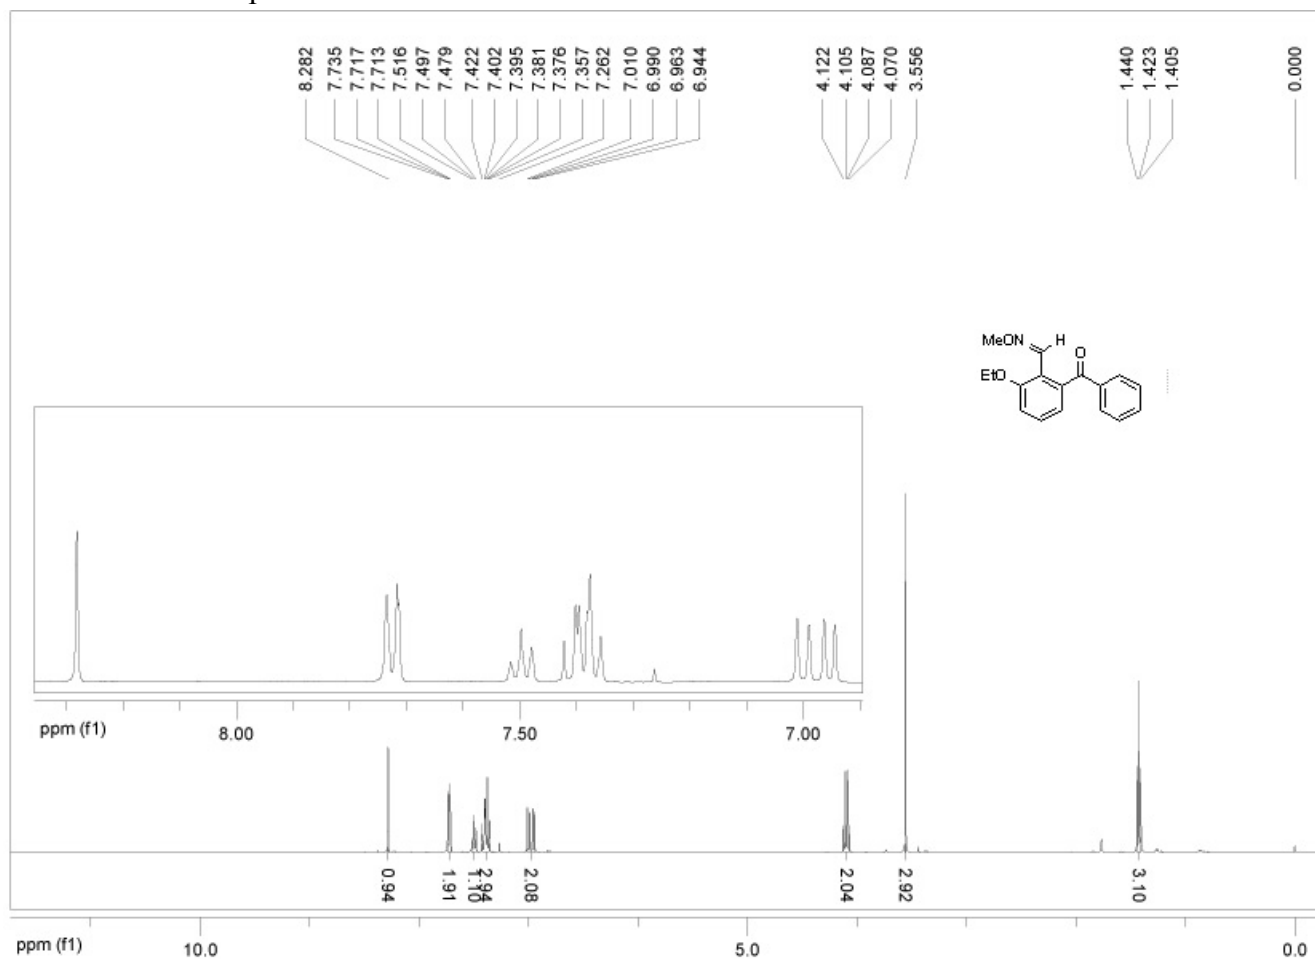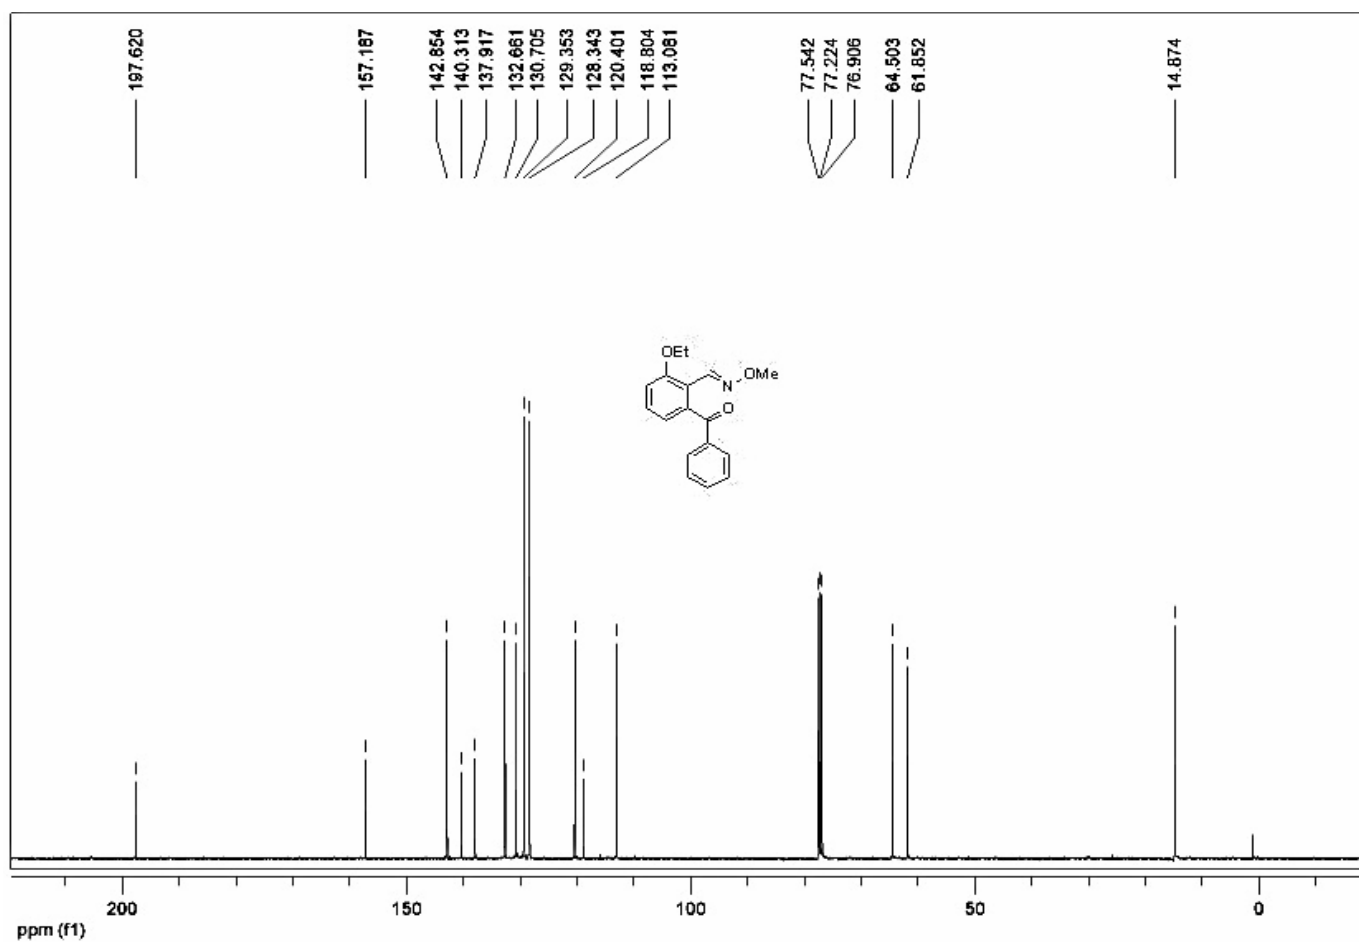

$^1\text{H}$  and  $^{13}\text{C}$  NMR Spectra for **3i**

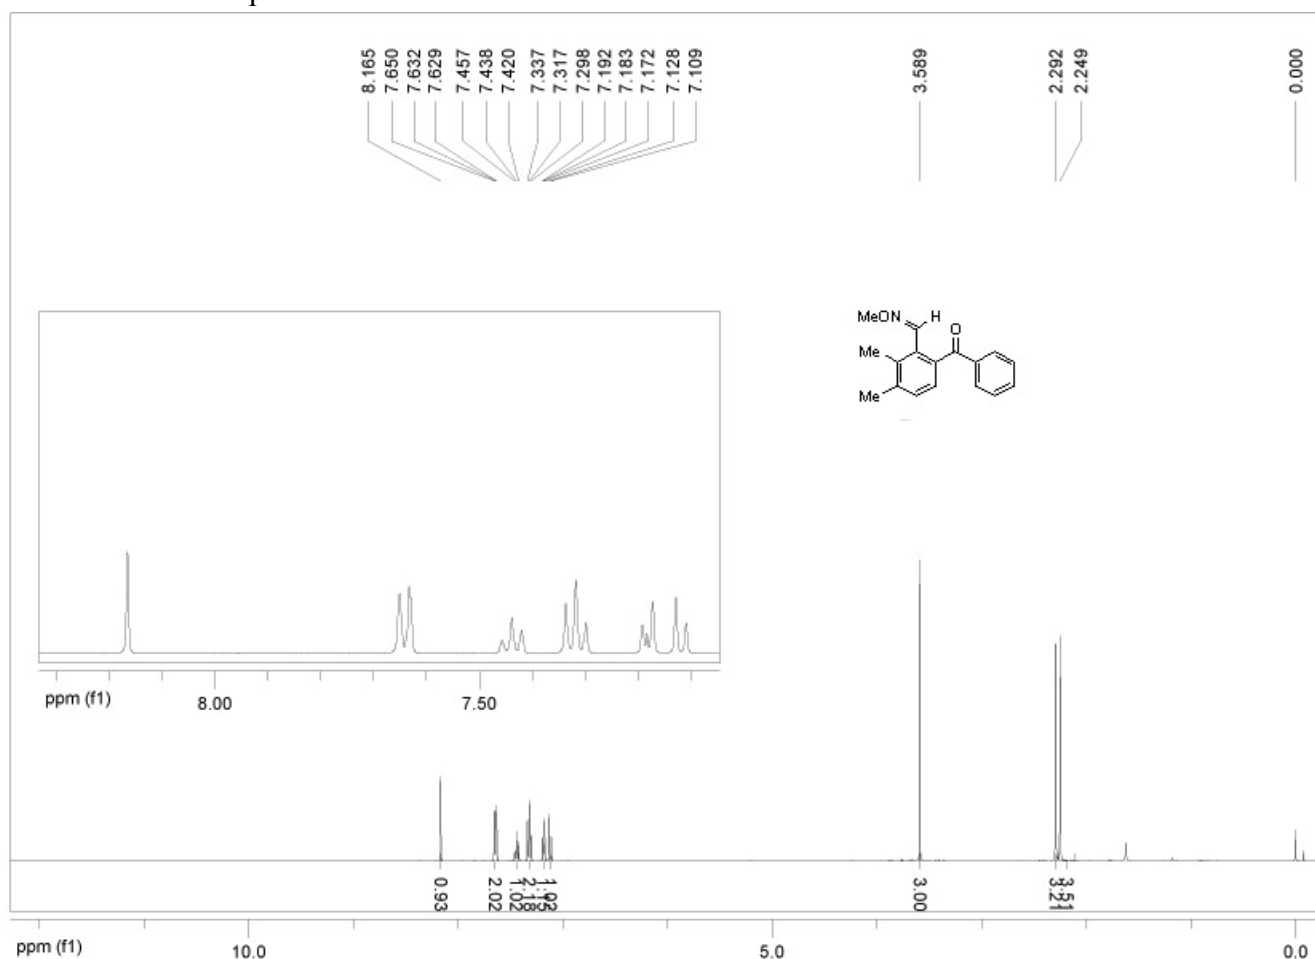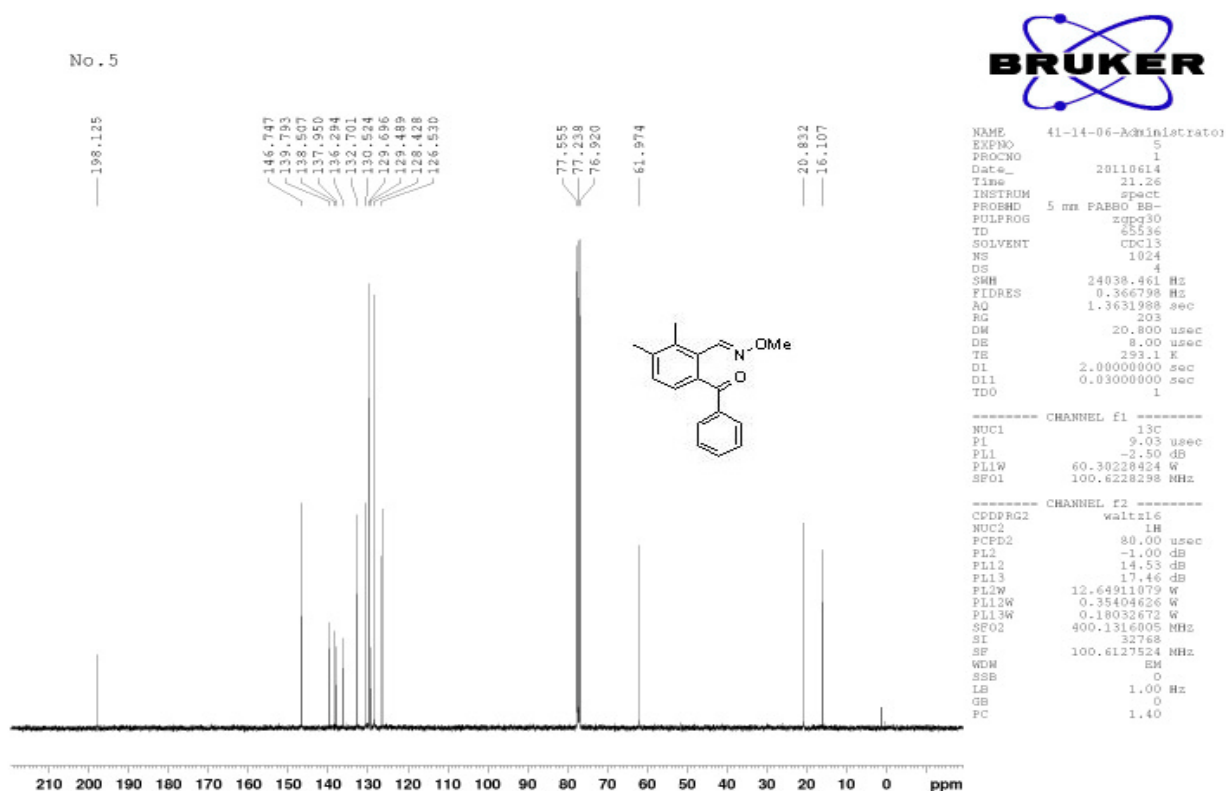

# <sup>1</sup>H and <sup>13</sup>C NMR Spectra for **3j**

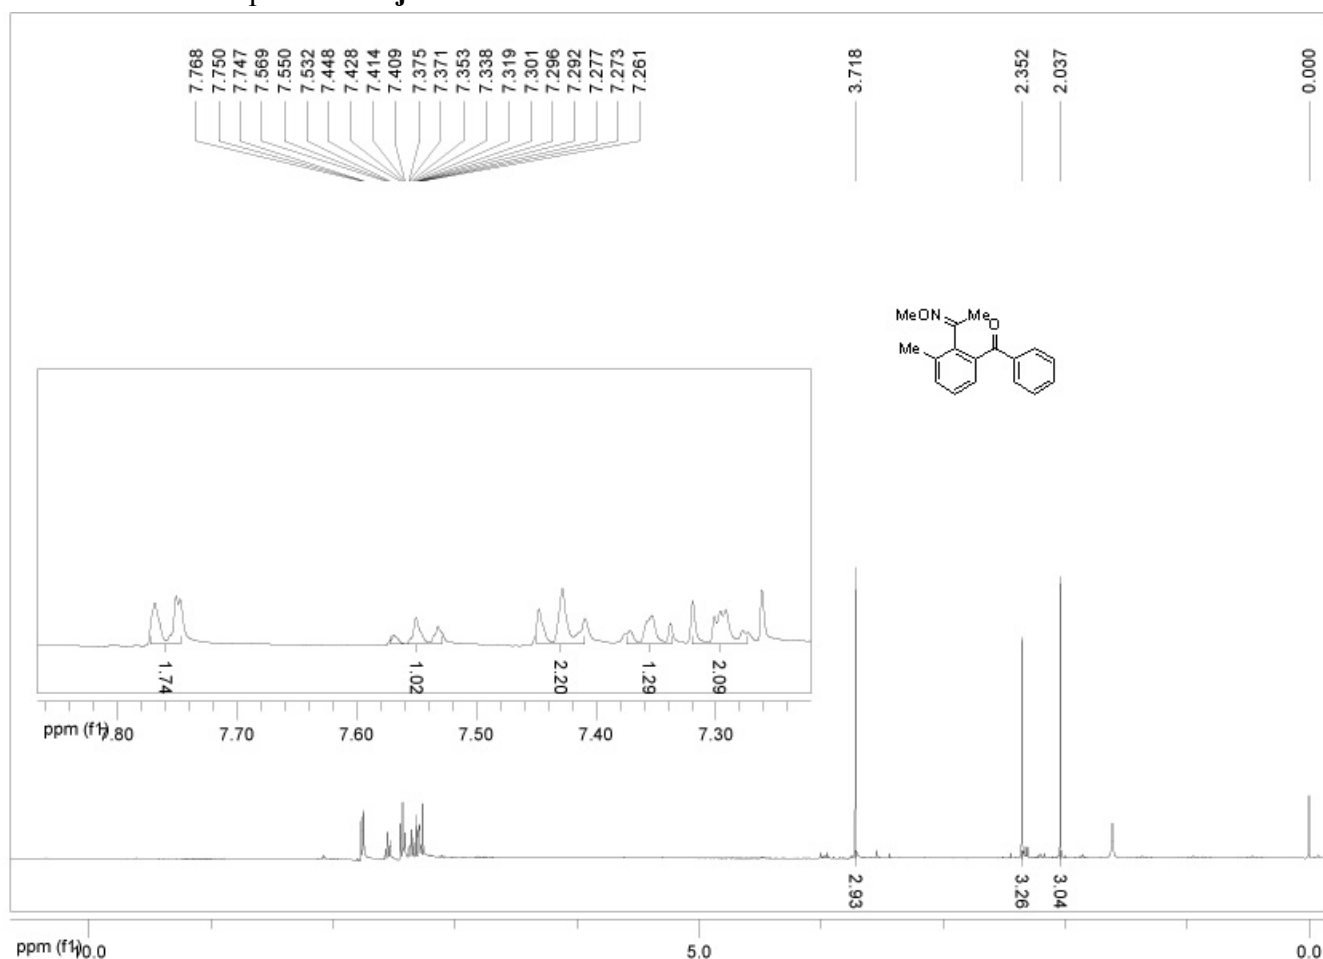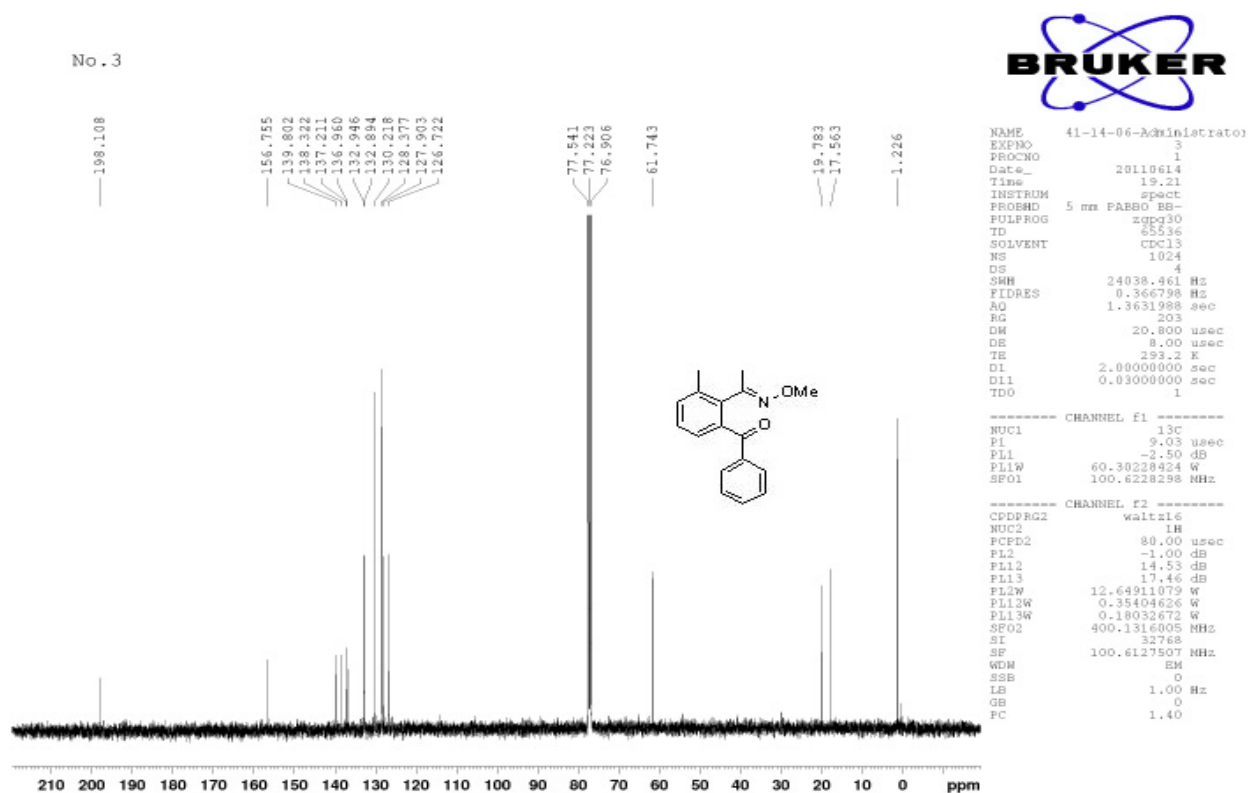

# <sup>1</sup>H and <sup>13</sup>C NMR Spectra for 4a

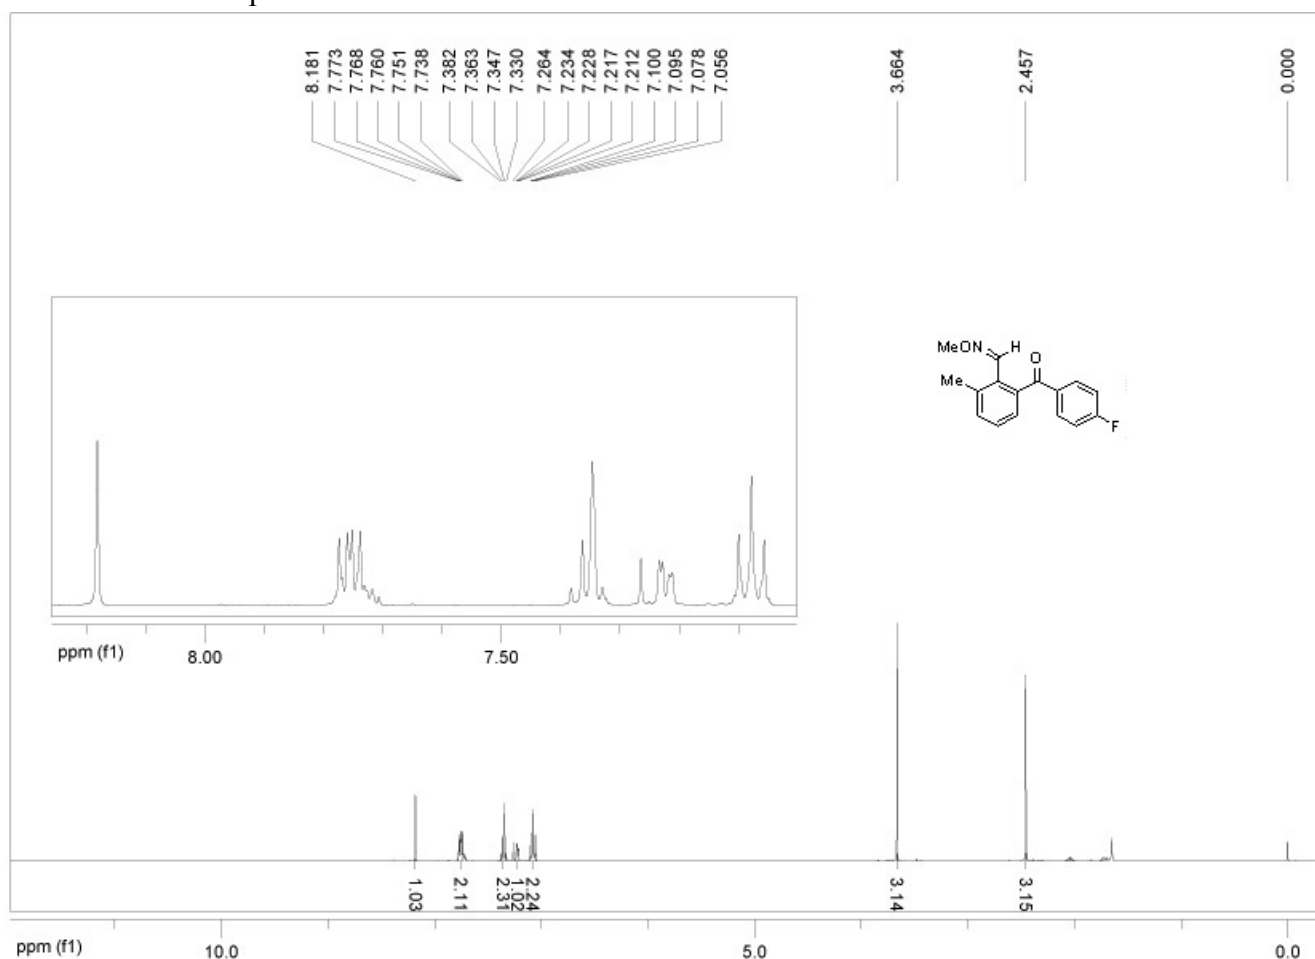

$^1\text{H}$  and  $^{13}\text{C}$  NMR Spectra for **4b**

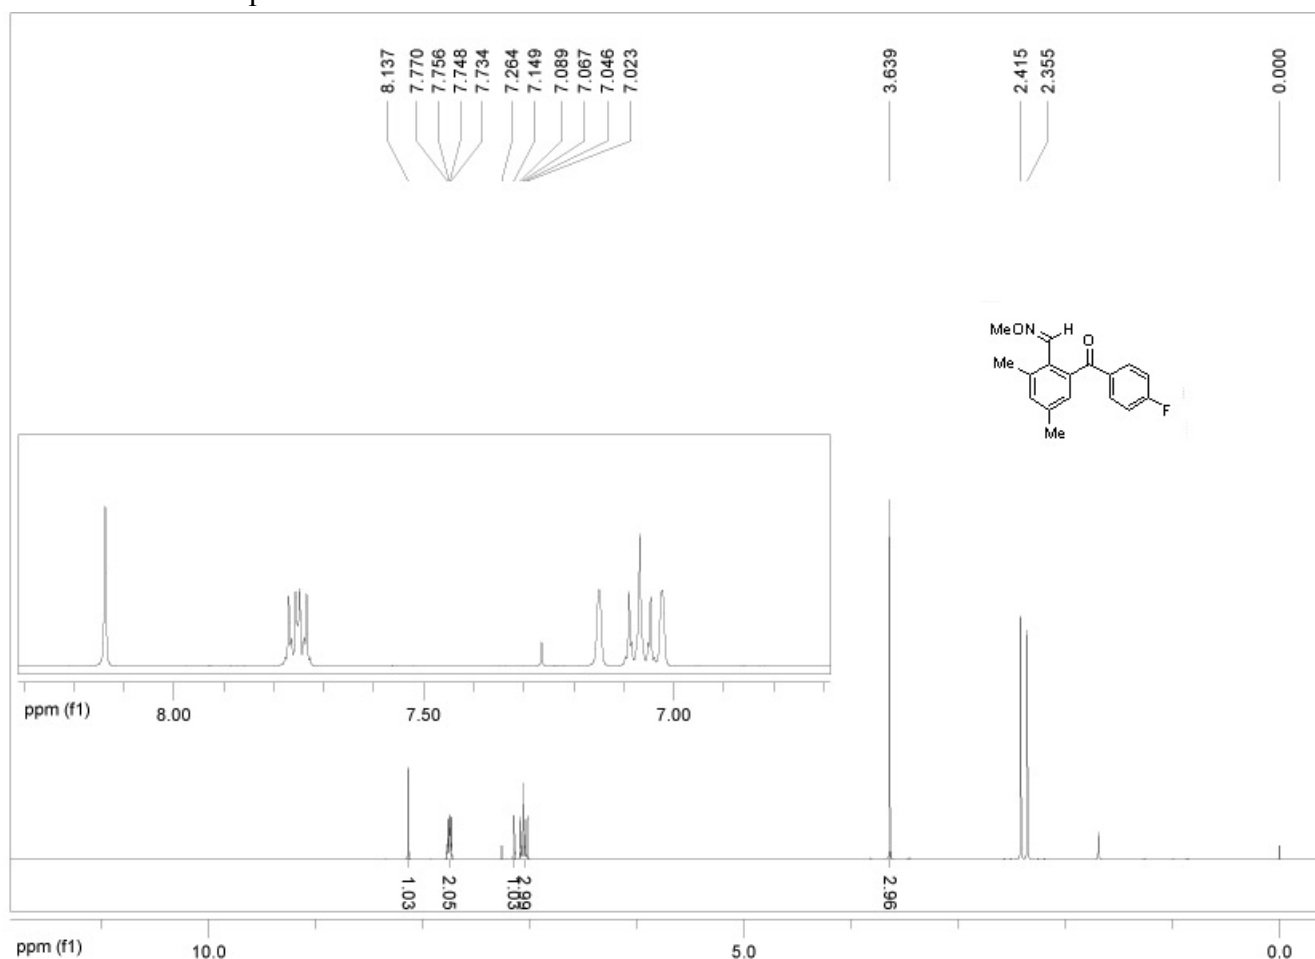

Yang-5

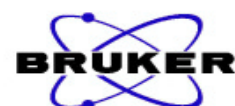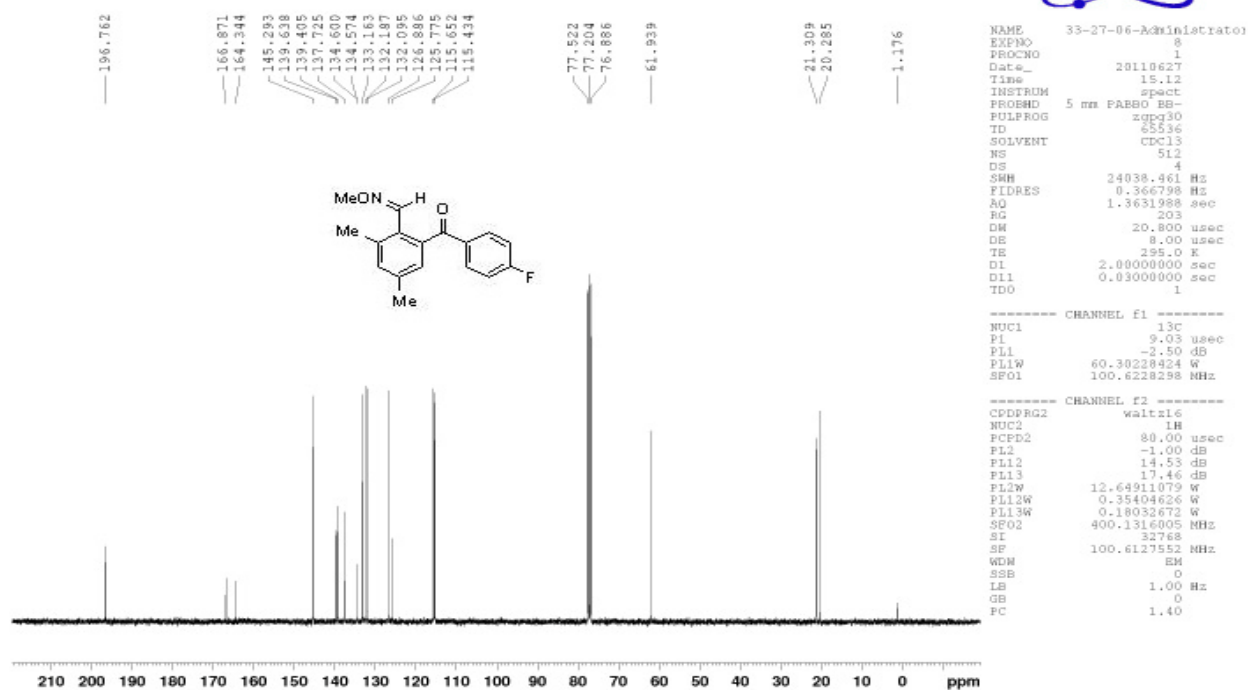

$^1\text{H}$  and  $^{13}\text{C}$  NMR Spectra for **4c**

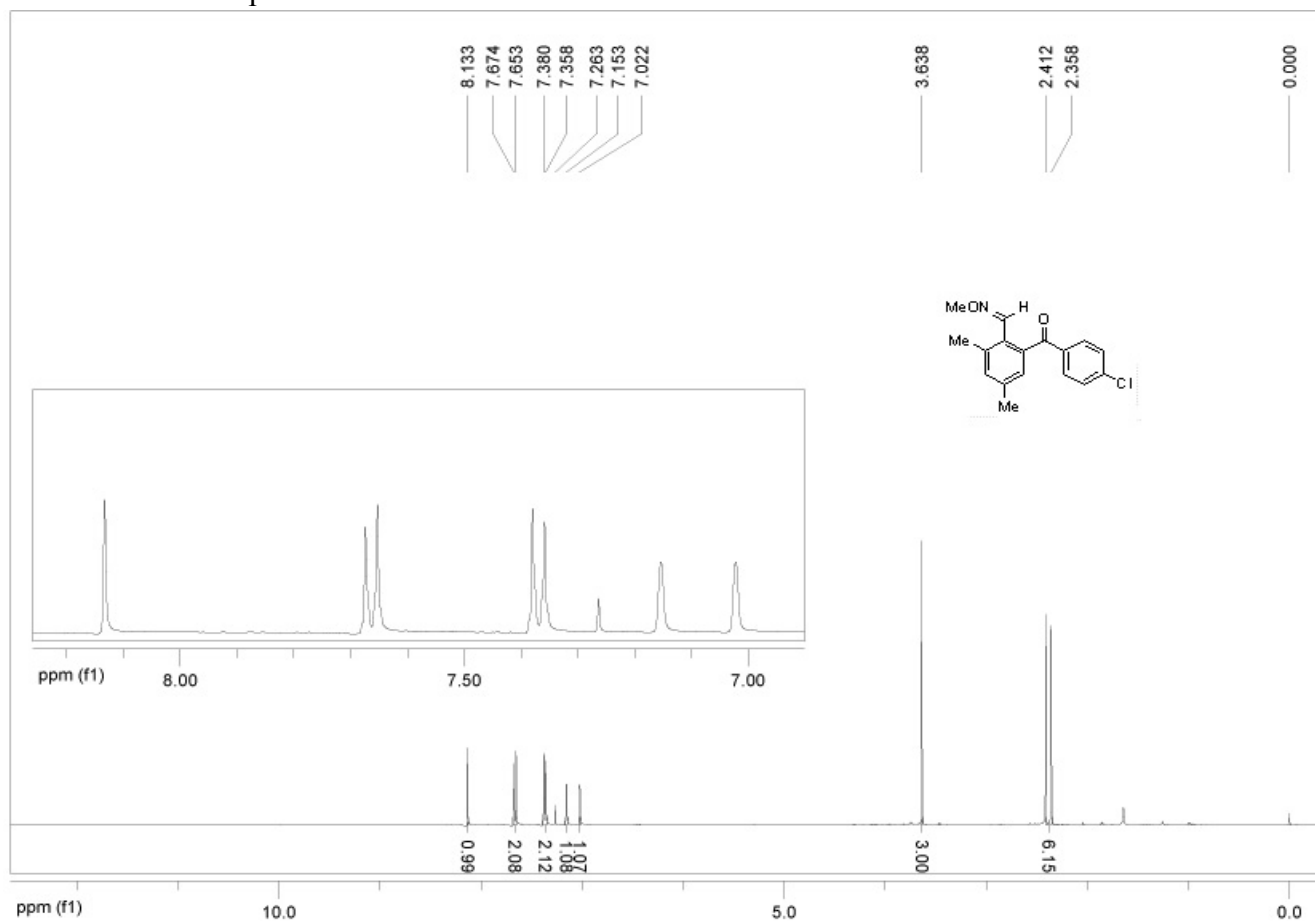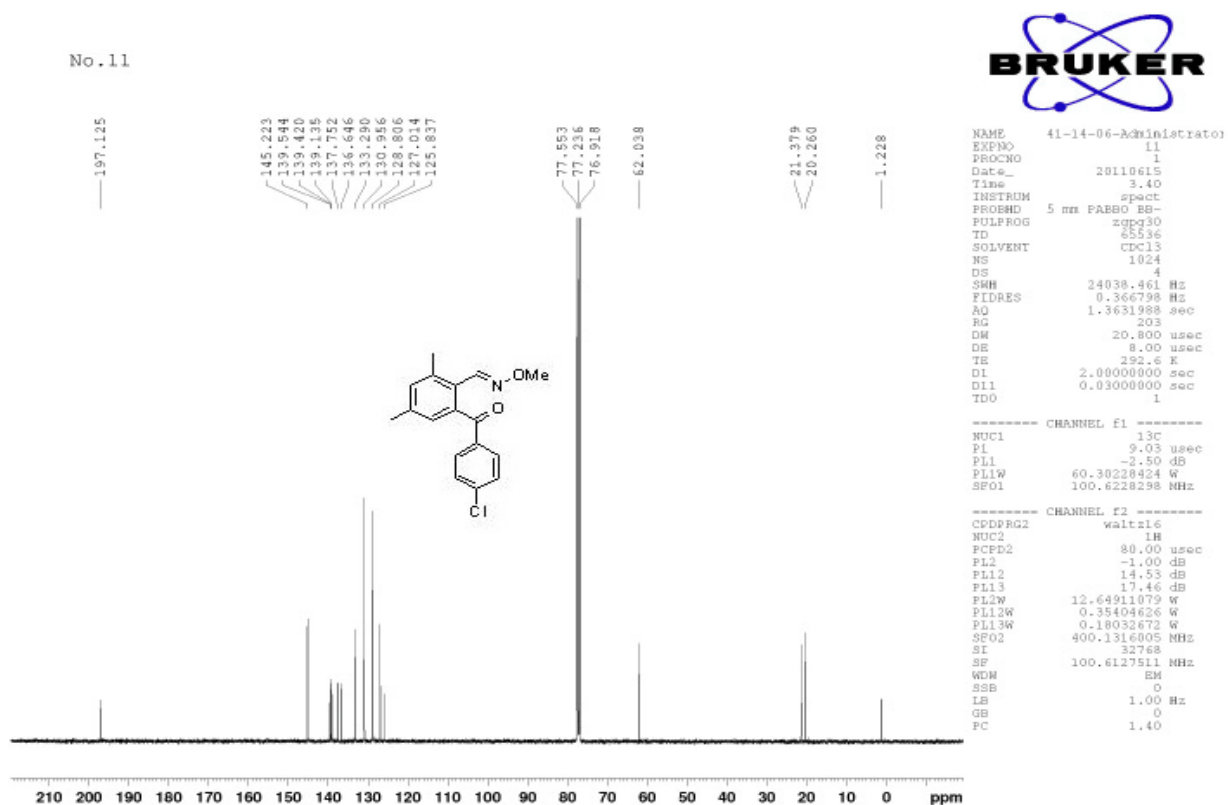

$^1\text{H}$  and  $^{13}\text{C}$  NMR Spectra for **4d**

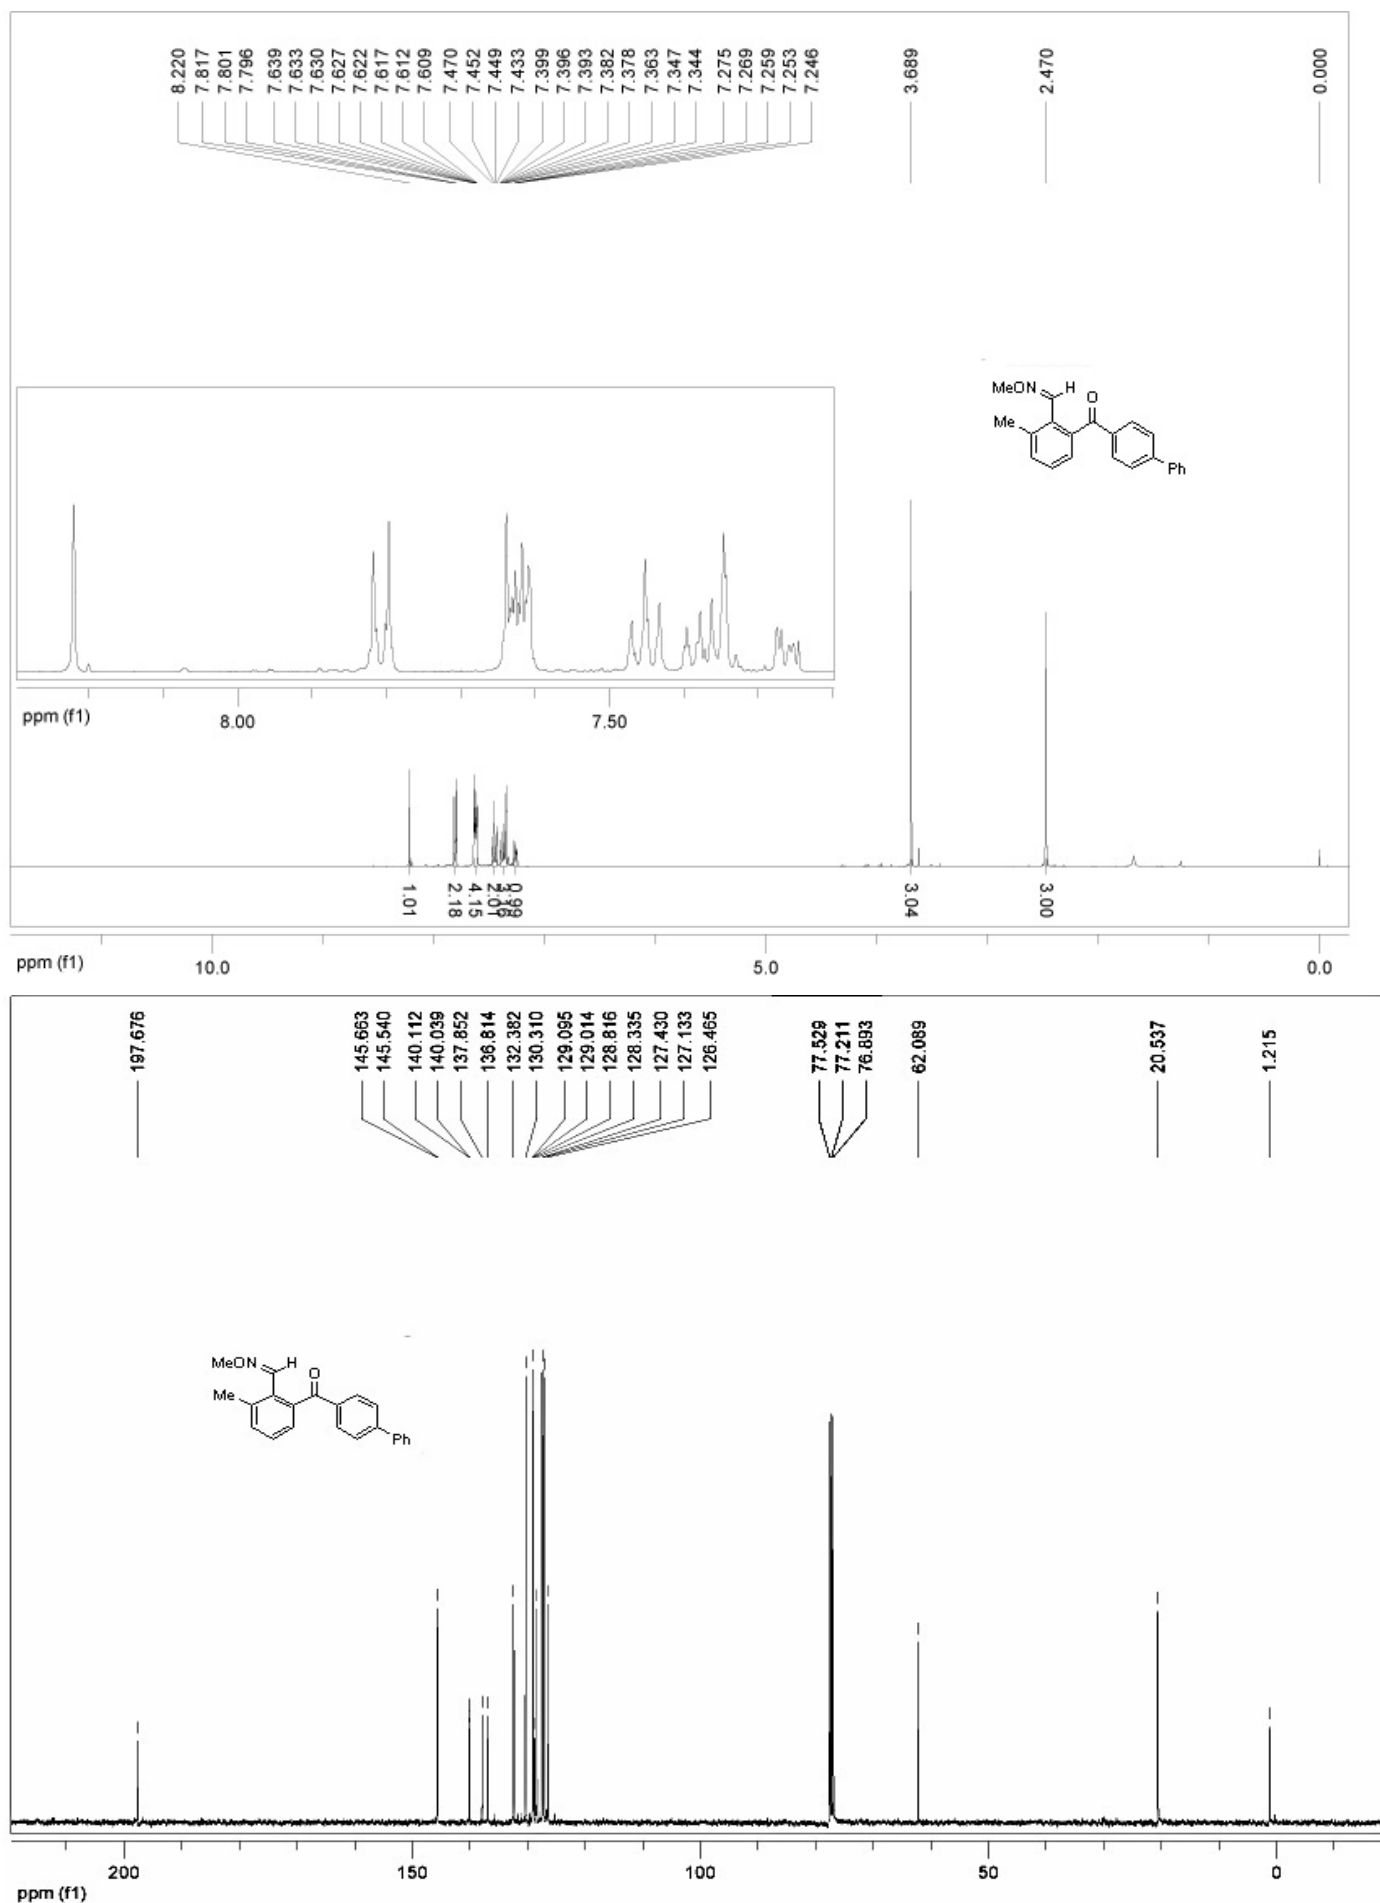

$^1\text{H}$  and  $^{13}\text{C}$  NMR Spectra for **4e**

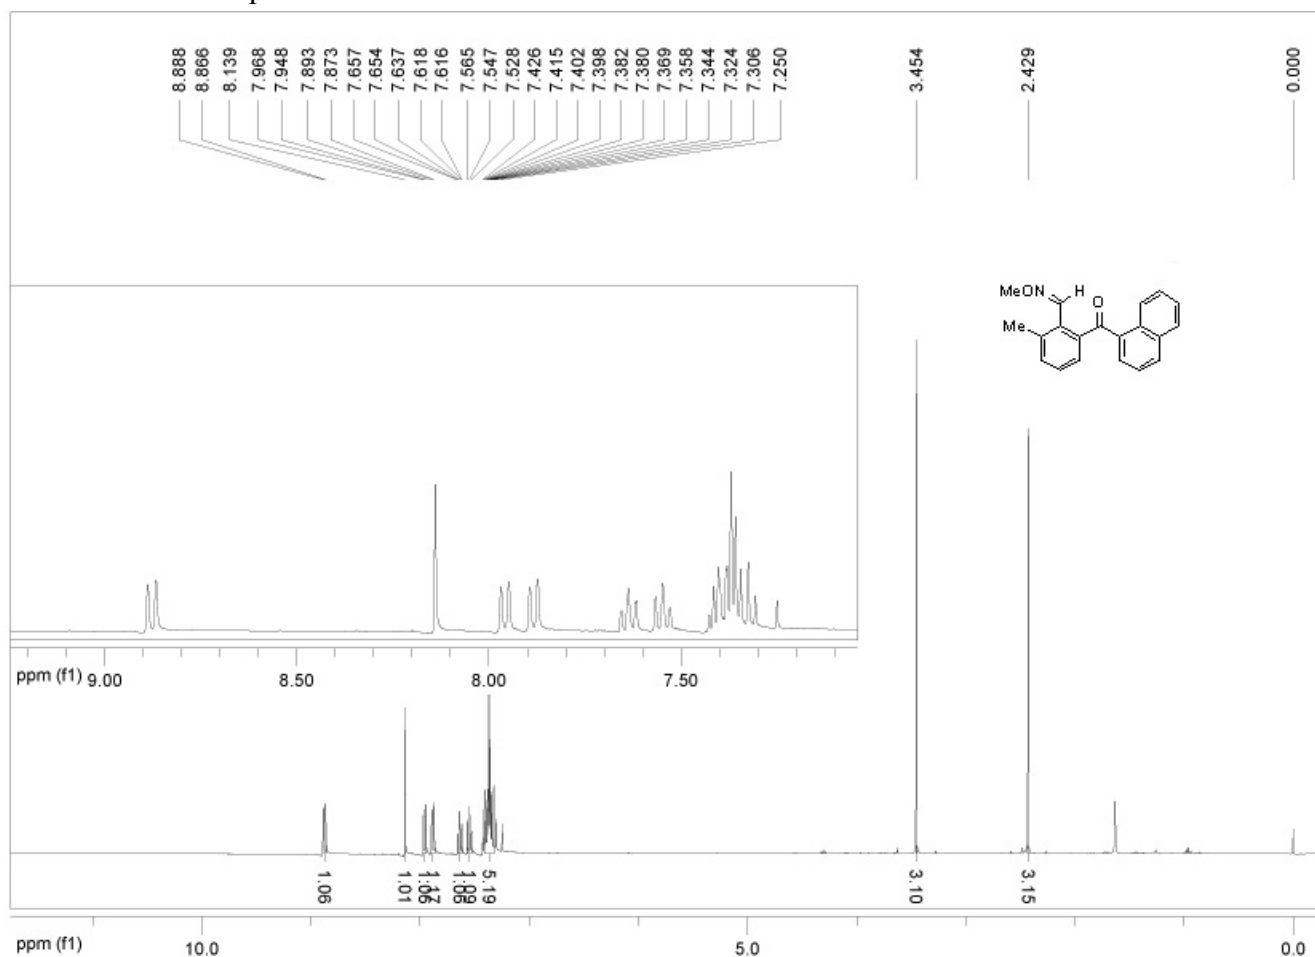

Yang-1

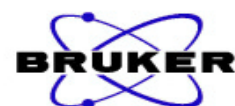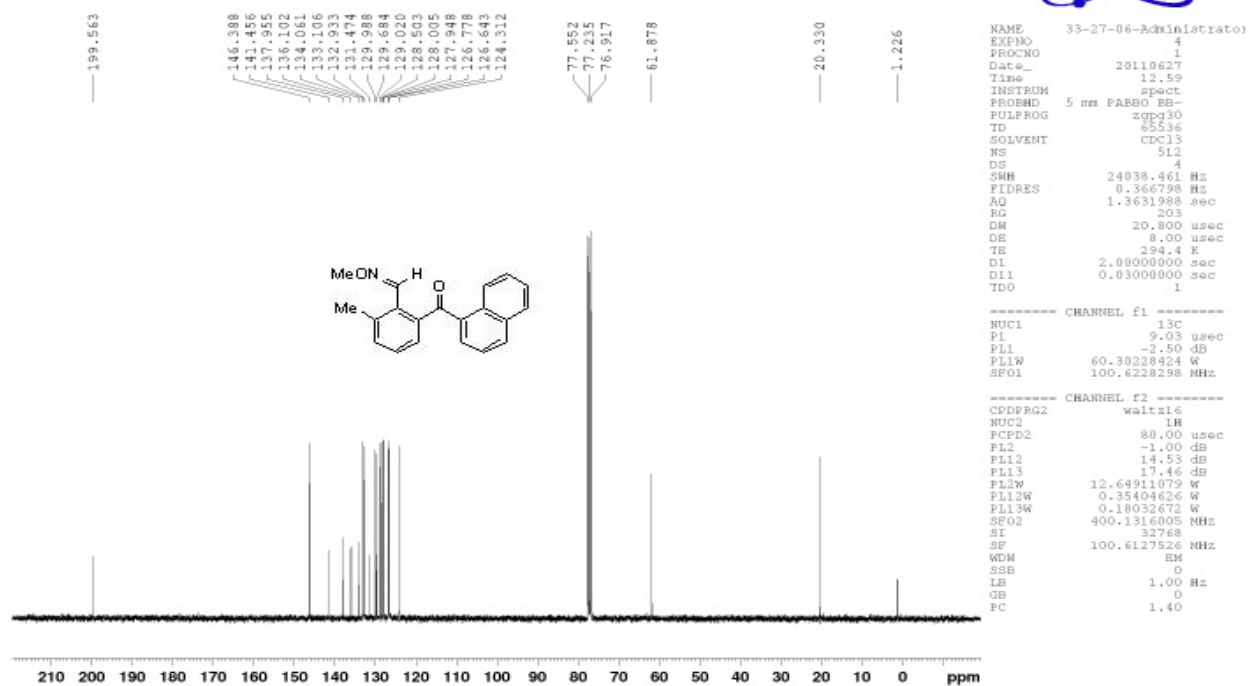

$^1\text{H}$  and  $^{13}\text{C}$  NMR Spectra for **4f**

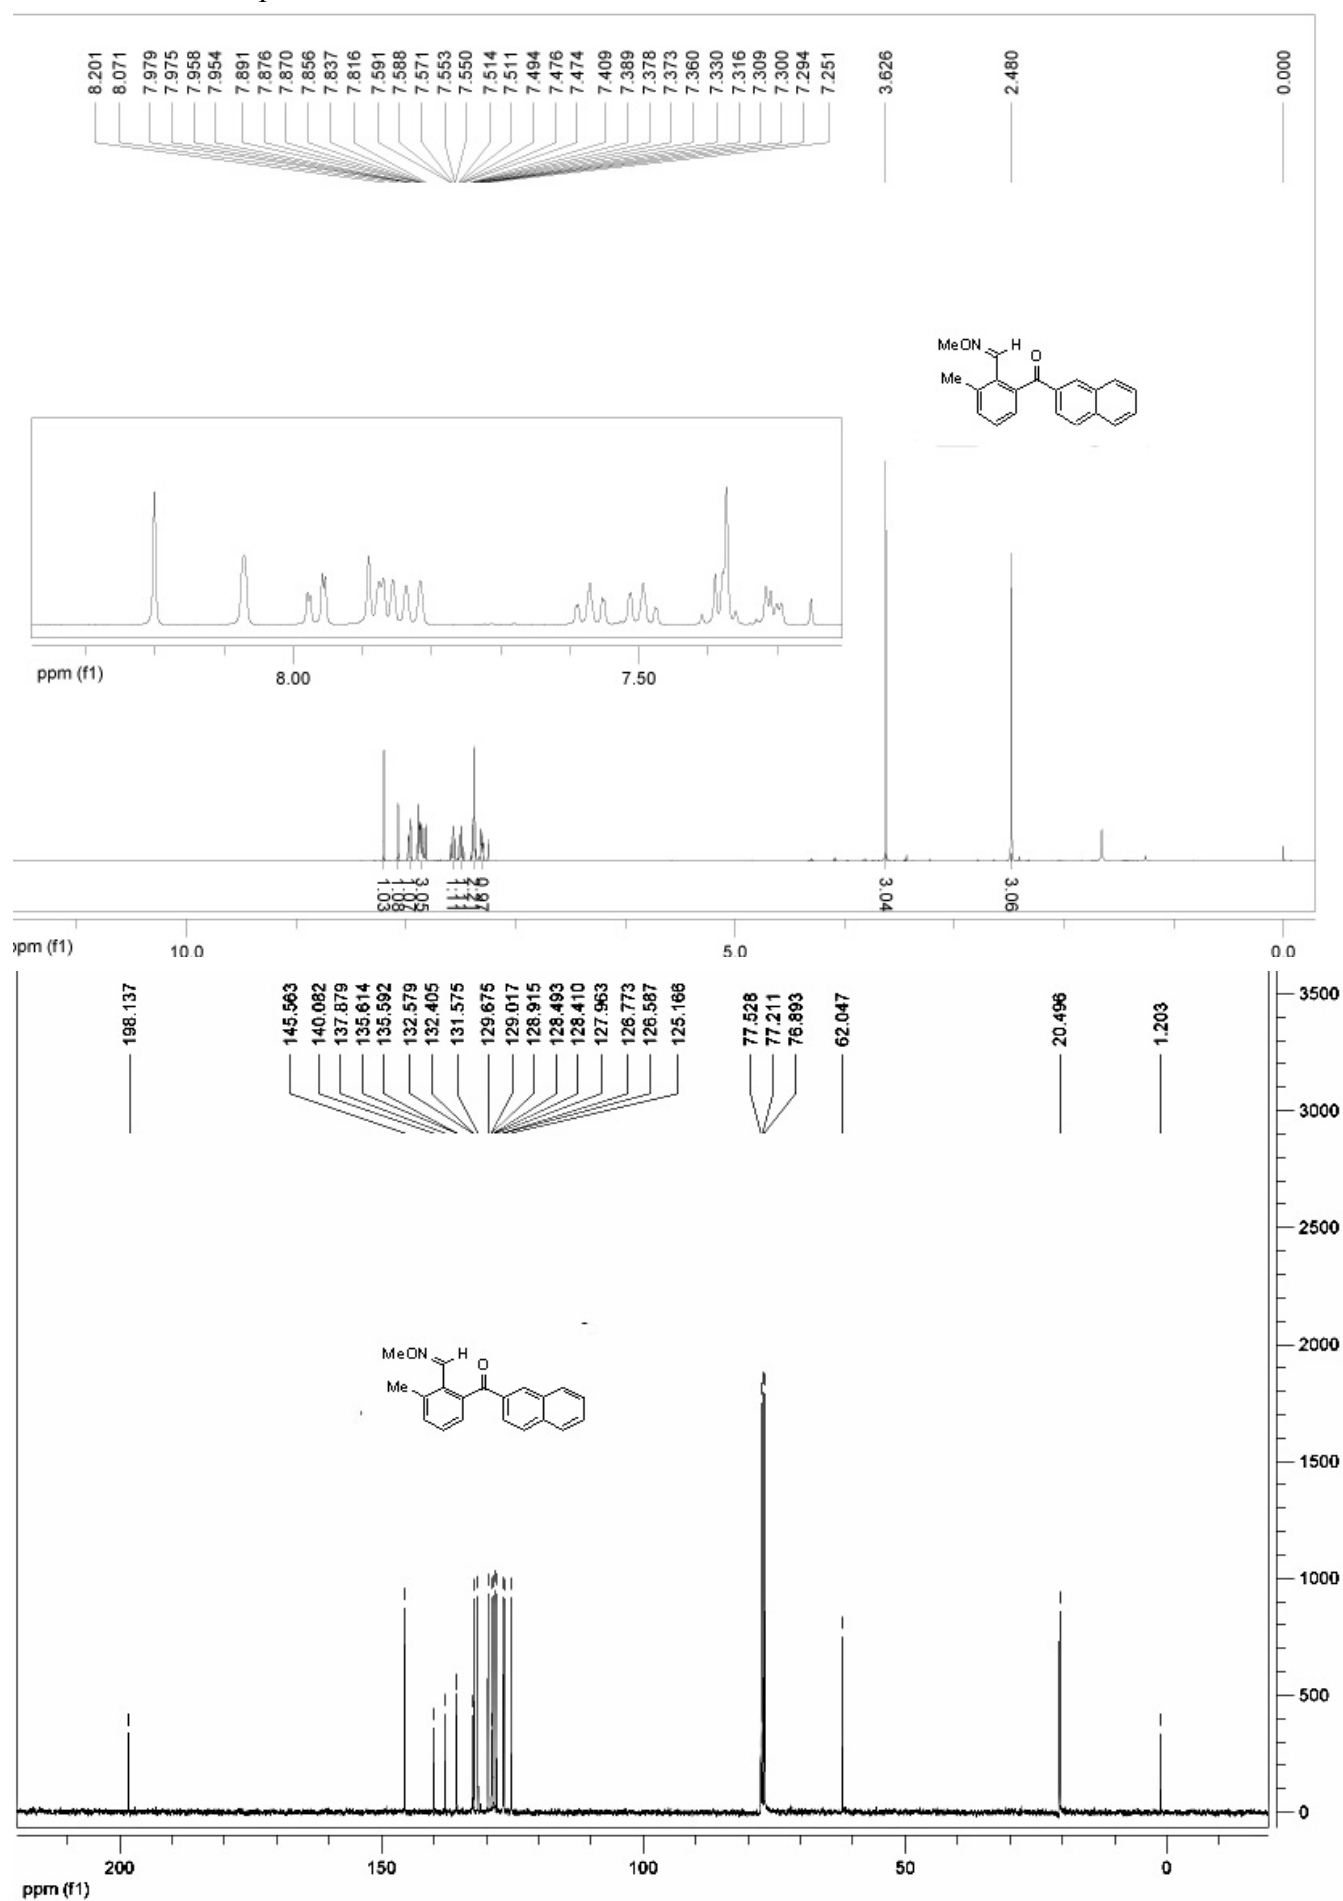

$^1\text{H}$  and  $^{13}\text{C}$  NMR Spectra for **4g**

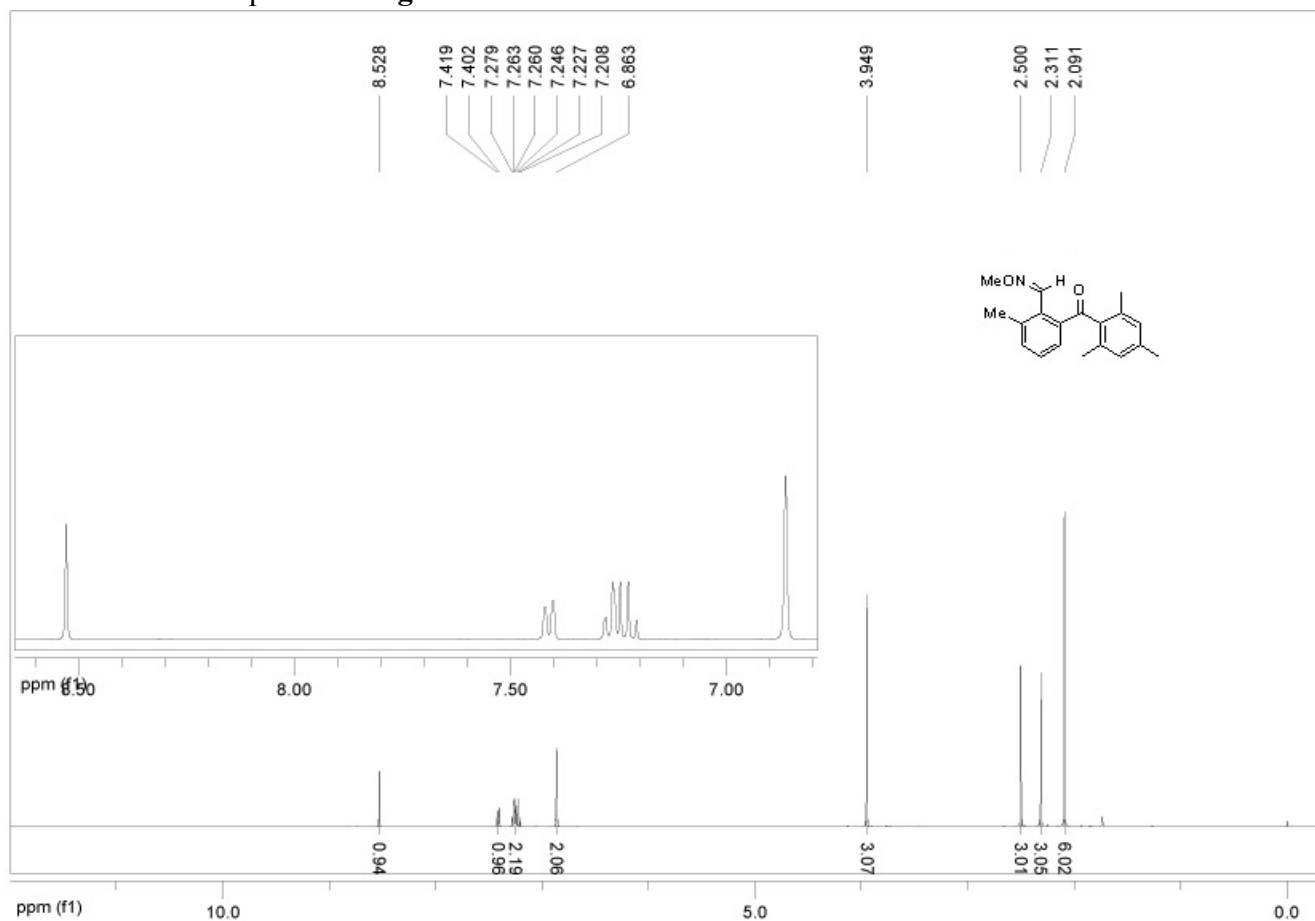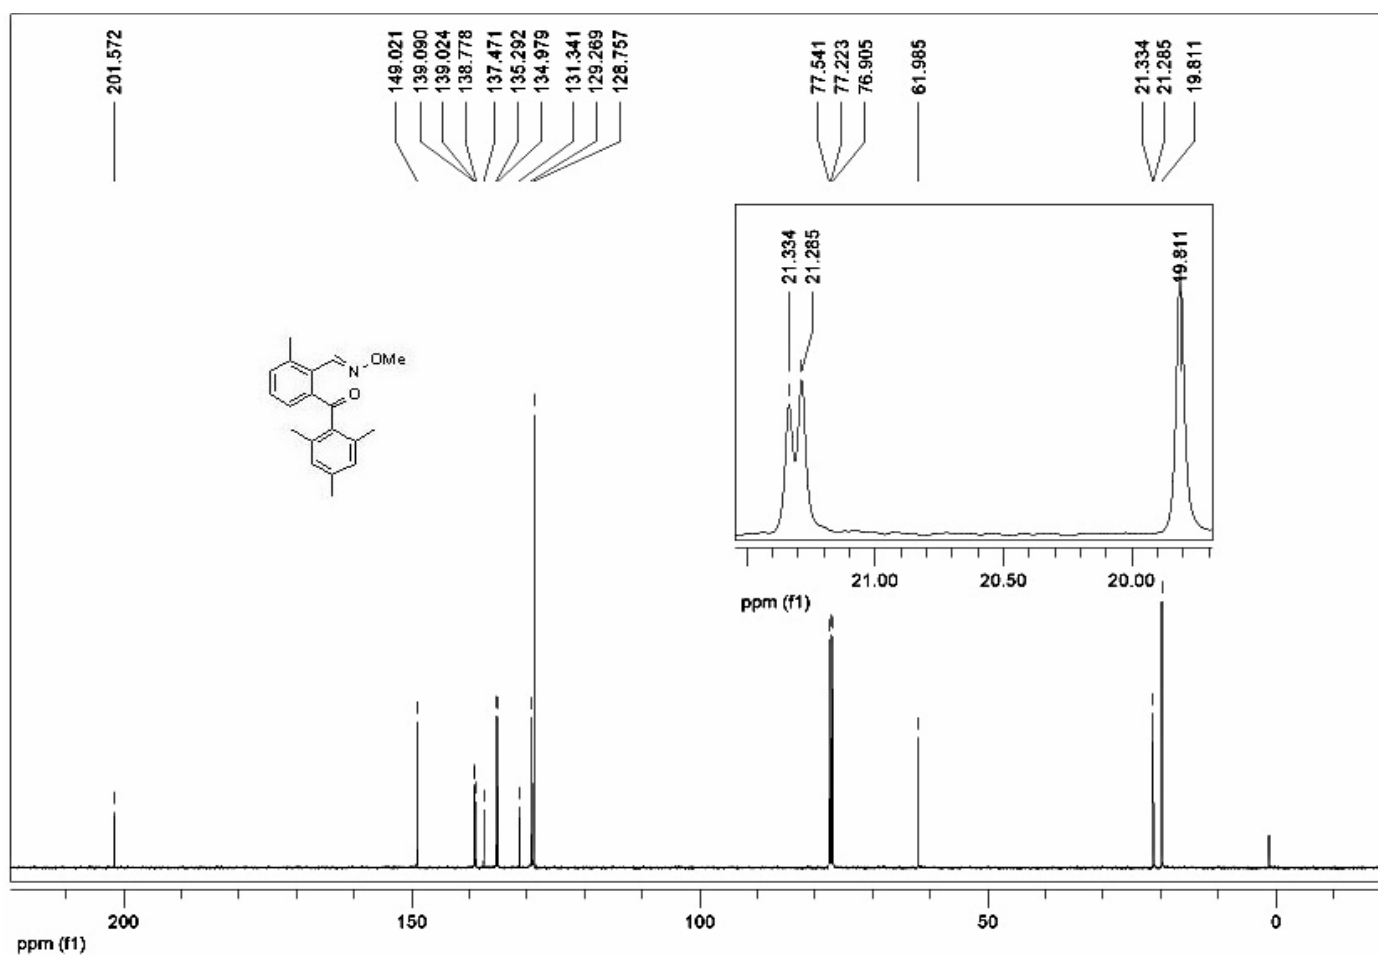

# <sup>1</sup>H and <sup>13</sup>C NMR Spectra for 4h

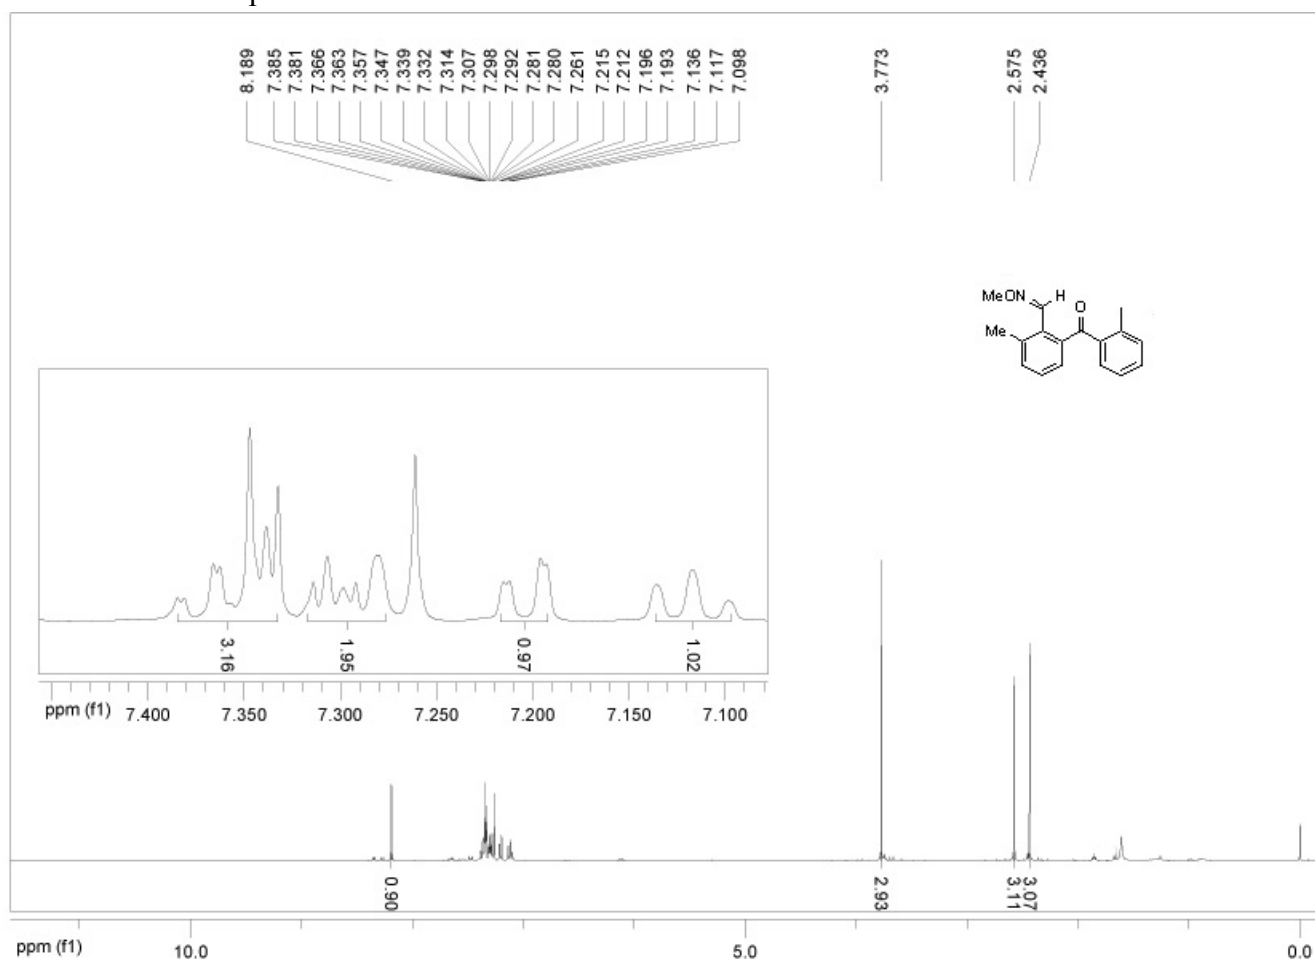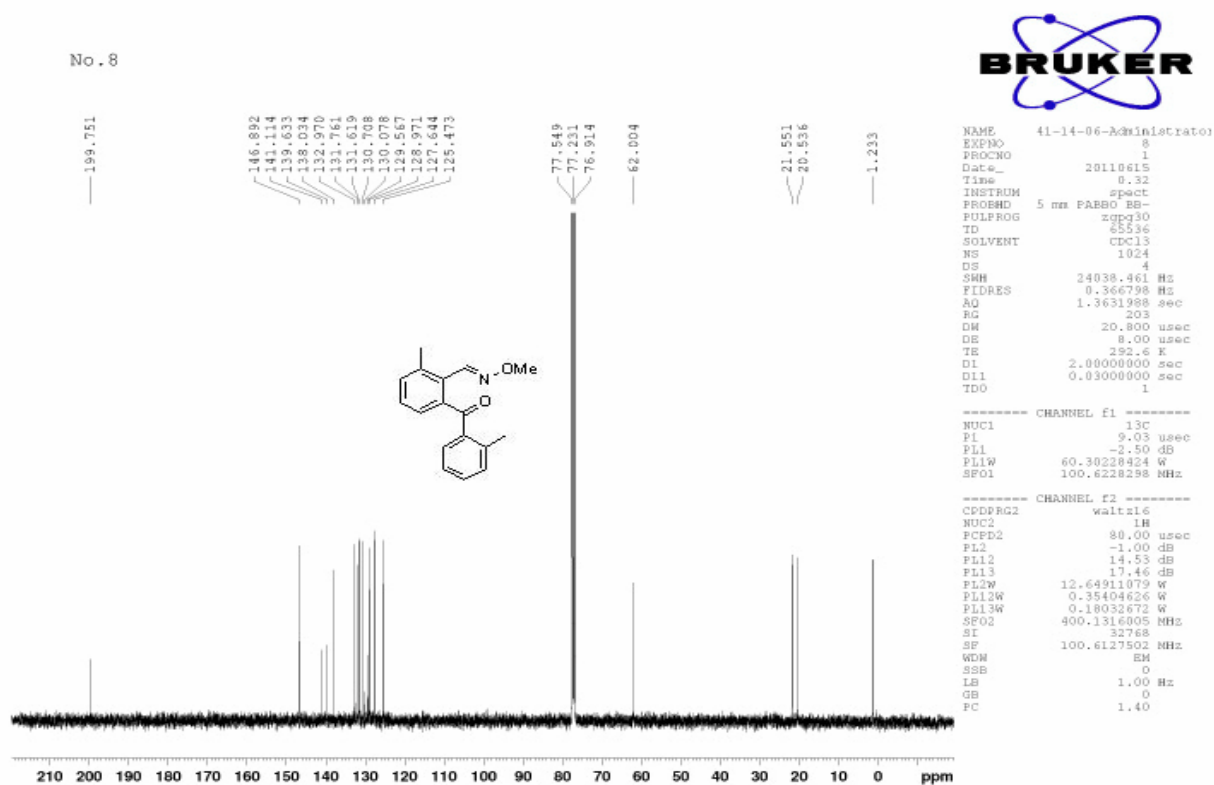

$^1\text{H}$  and  $^{13}\text{C}$  NMR Spectra for **4i**

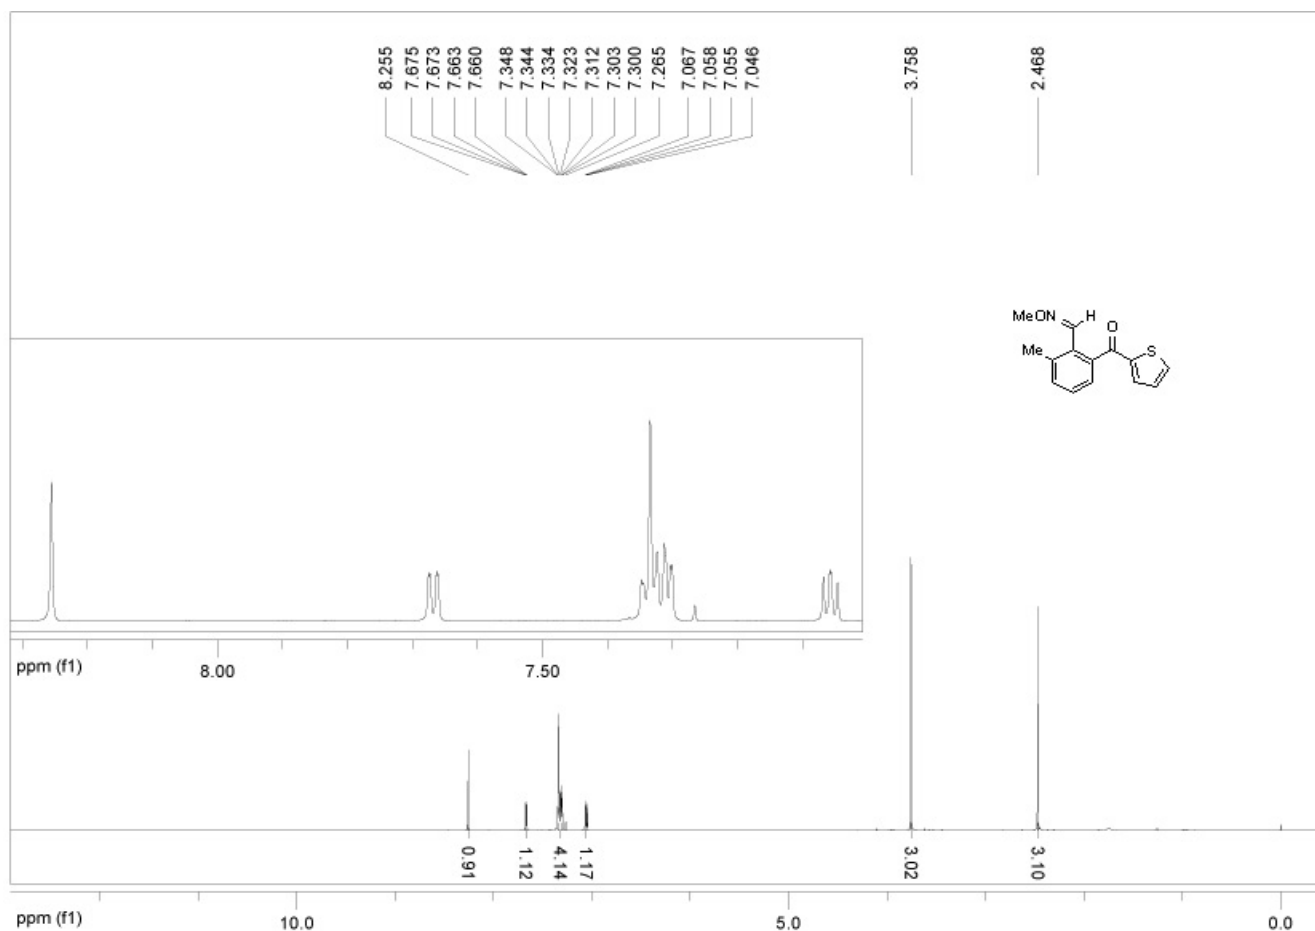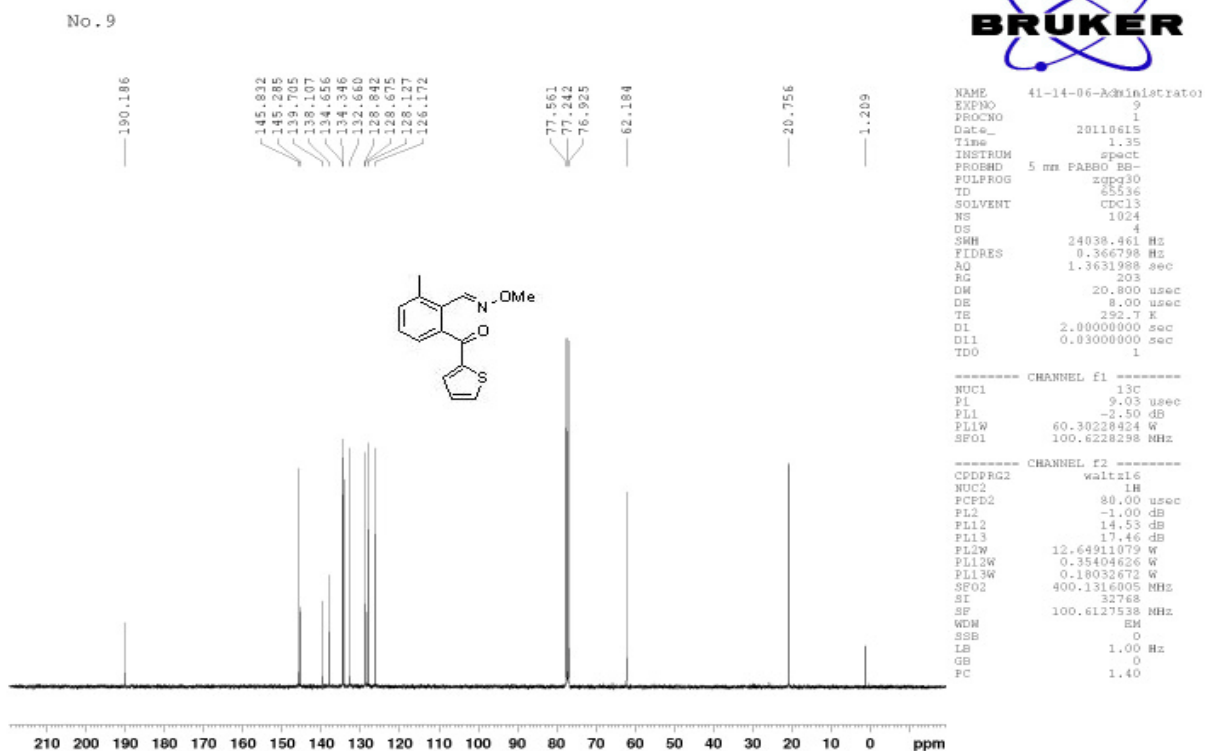

<sup>1</sup>H and <sup>13</sup>C NMR Spectra for 4j

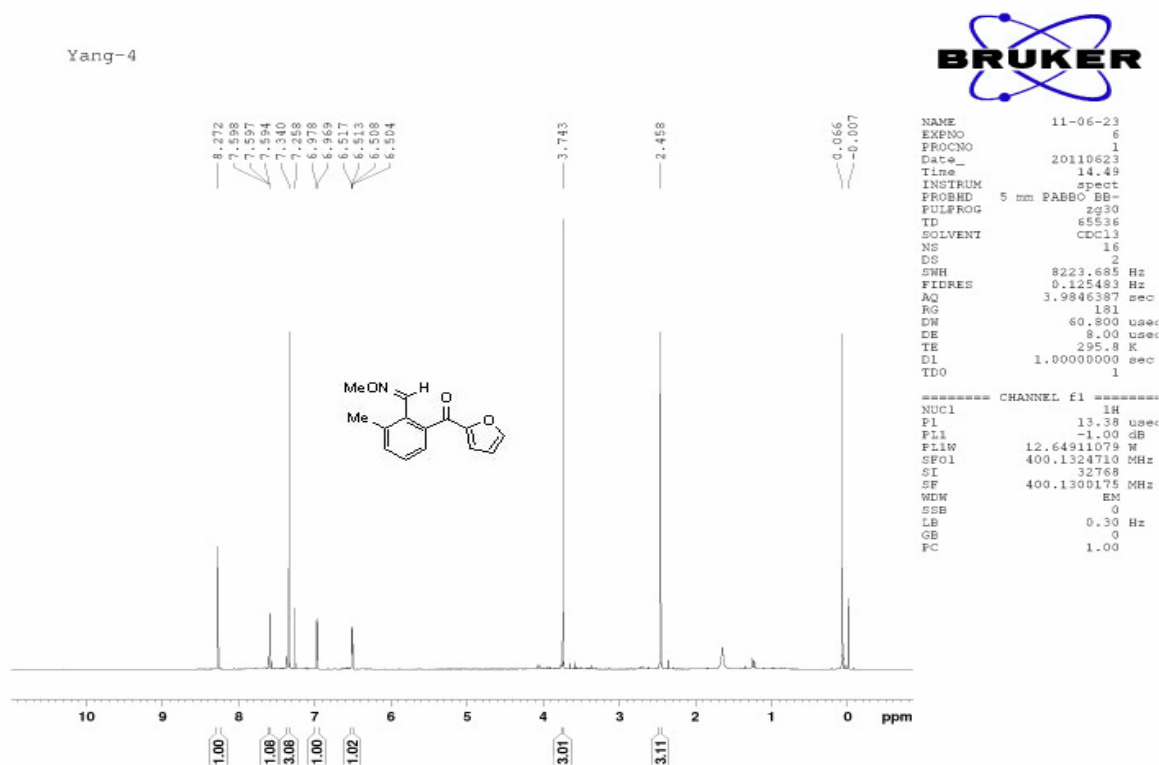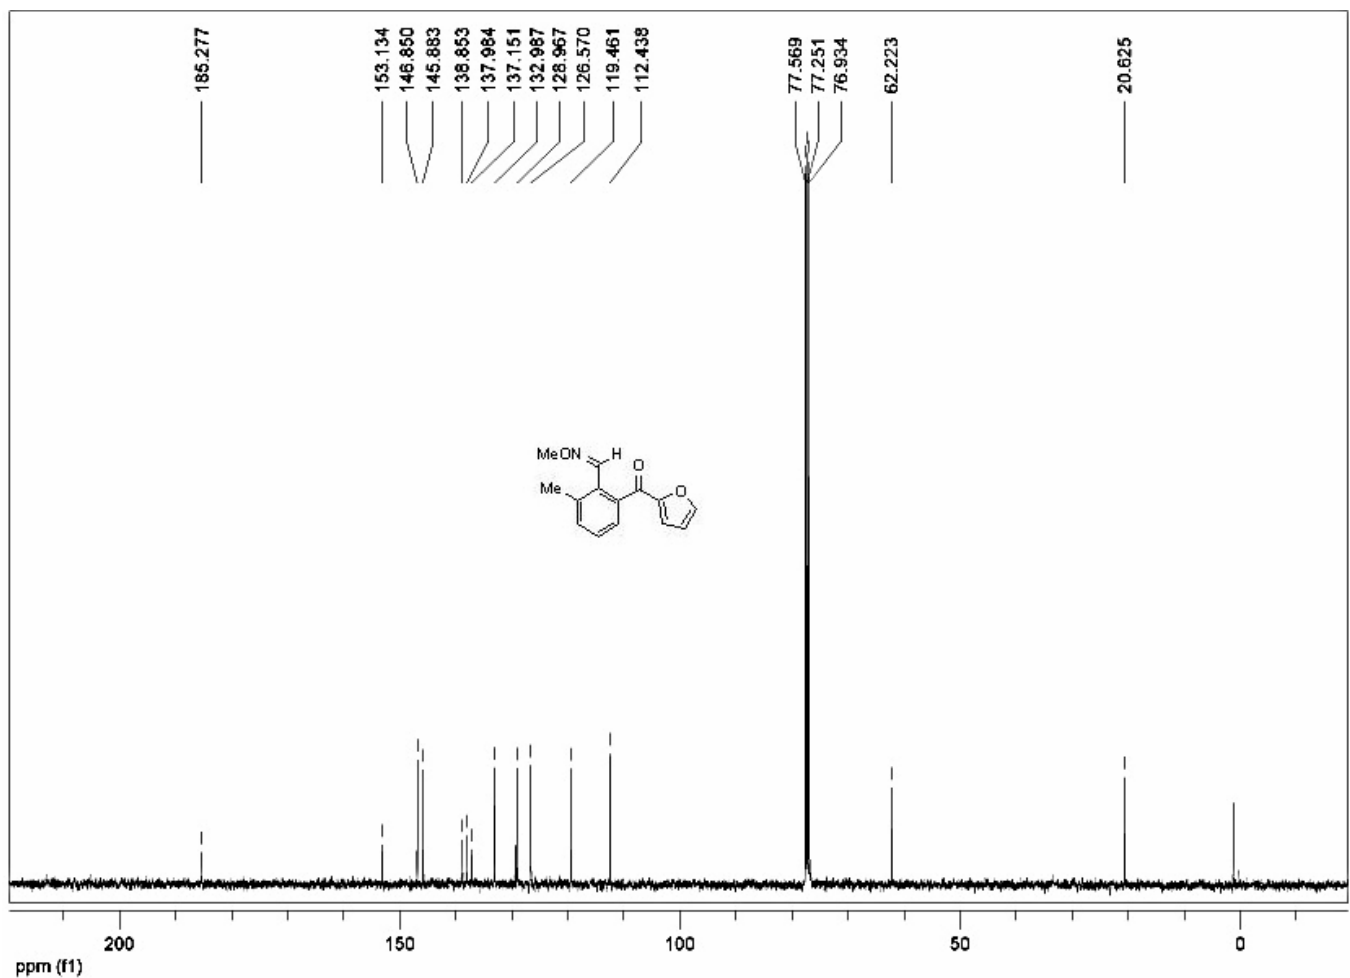

$^1\text{H}$  NMR for crude  $\text{C}_{22}\text{H}_{20}\text{F}_6\text{N}_2\text{O}_6\text{Pd}_2$

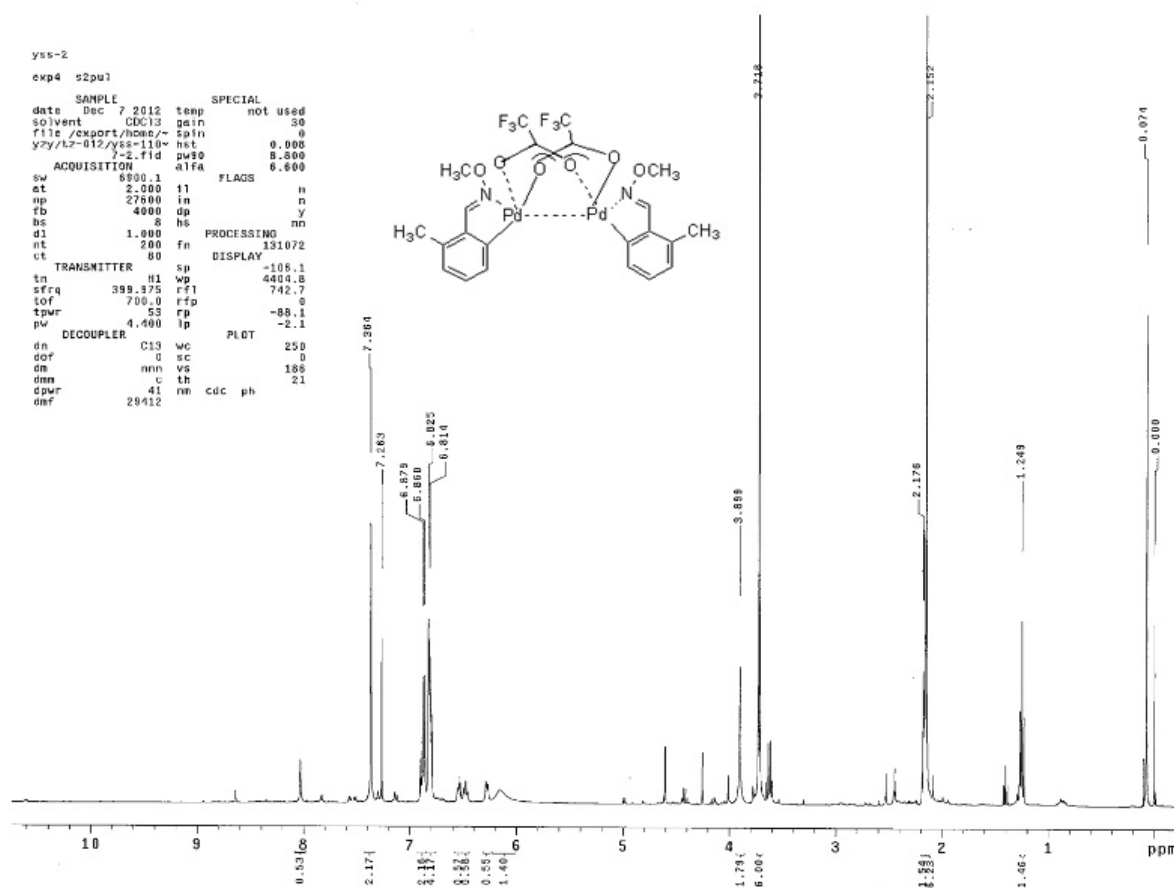

$^1\text{H}$  NMR for purified  $\text{C}_{22}\text{H}_{20}\text{F}_6\text{N}_2\text{O}_6\text{Pd}_2$

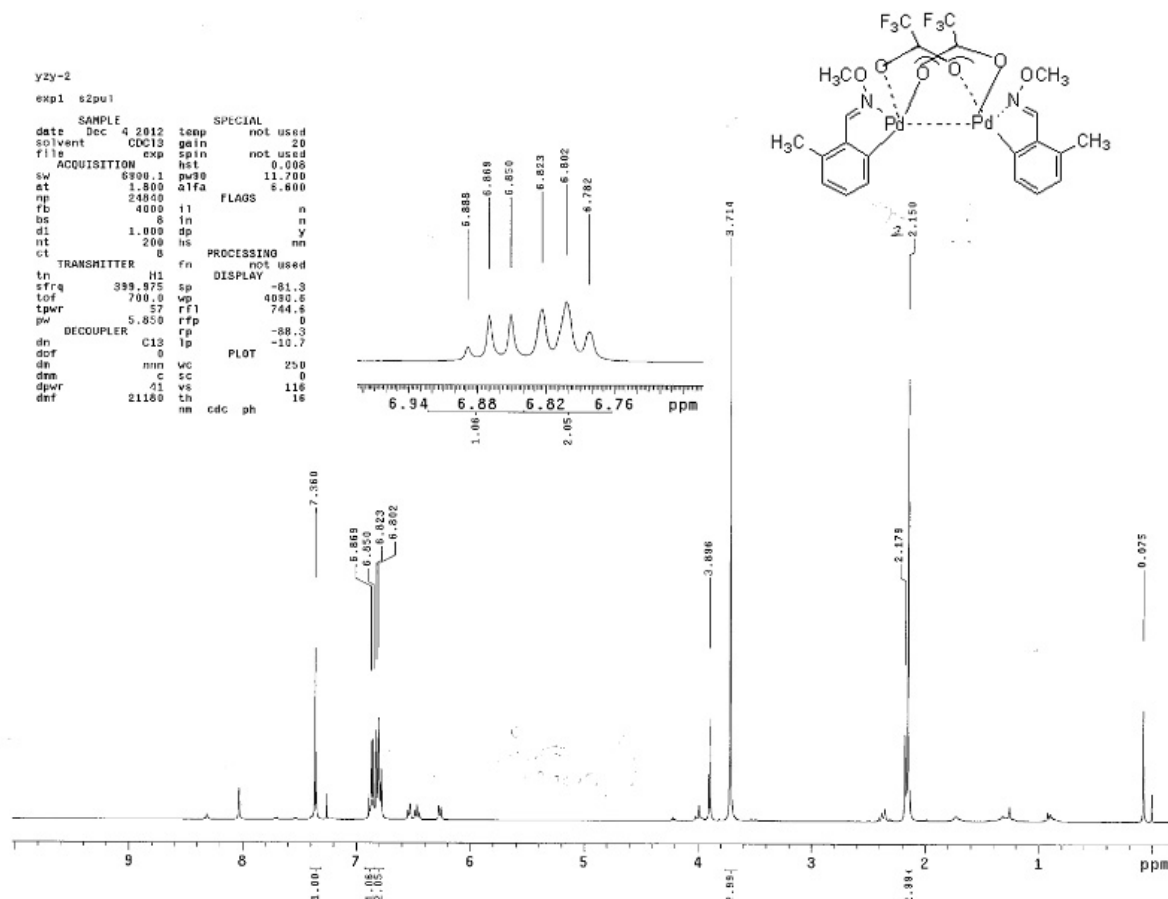

Supplement: c2cc38861h.pdf [file c2cc38861h.pdf]
